# Supplementary material for: Consumer beliefs about healthy foods and diets
Source: PubMed Central journal article supplement (PMC6793866; doi:10.1371/journal.pone.0223098), 2019-10-15
Supplement: pone.0223098.s001.pdf [file pone.0223098.s001.pdf]

# **Corn Refiners Association Survey**

## Topline Results

Author: Jayson Lusk

Date: 1/2/19

This document reports the topline results of the responses to a nationwide U.S. of 1,290 respondents who met exclusionary criteria. This sample size provides a margin of error of plus or minus 2.7%. Responses are weighted to match the U.S. population in terms of gender, age, education, and region of residence. The survey was fielded in mid-December 2018.

Q2 How much of the grocery shopping do you do for your household?

- I buy almost all the groceries for my household (68.1%)
- I buy most of the groceries for my household (15.8%)
- I buy about half of the groceries for my household (16.2%)
- I buy less than half the groceries for my household (excluded)
- I rarely buy the groceries for my household (excluded)

Q3 Is there additional information you would like to see on food packages that is not typically there?

- Yes (29.6%)
- No (70.4%)

*Display This Question:*  
*If Q3 = Yes*

Q4 What additional information would you like to see on food packages? *(please type your answer in the blank below)*

<<see report for full analysis of this open ended question>>

Q5 Which of the following labels or information on food packages do you find to be most informative? *(check up to 3 items that most apply)*

|                          |       |
|--------------------------|-------|
| health claim             | 8.6%  |
| natural label            | 9.0%  |
| organic label            | 10.8% |
| origin label             | 11.6% |
| healthy label            | 14.3% |
| non-GMO label            | 15.8% |
| brand name               | 29.5% |
| package weight or volume | 33.3% |
| nutrition facts panel    | 61.1% |
| ingredient list          | 69.0% |

Q6 How important are the following items to you when deciding which foods to buy? (please drag 3 items in to the most important box and 3 items into the least important box)

| Most Important (Place 3 items here) | Least Important (Place 3 items here) |
|-------------------------------------|--------------------------------------|
| Taste (72.7%)                       | Convenience (57.2%)                  |
| Price (69.9%)                       | Familiarity (56.6%)                  |
| Healthiness (54%)                   | Appearance (50.2%)                   |
| Safety (32.3%)                      | Environmental Impact (49.7%)         |
| Naturalness (22.5%)                 | Naturalness (37%)                    |
| Familiarity (15.5%)                 | Safety (15.5%)                       |
| Convenience (11.9%)                 | Price (14.5%)                        |
| Appearance (11.8%)                  | Healthiness (13.9%)                  |
| Environmental Impact (9.4%)         | Taste (5.4%)                         |

| Food Value           | % Most - % Least |
|----------------------|------------------|
| Taste                | 67.3%            |
| Price                | 55.4%            |
| Healthiness          | 40.2%            |
| Safety               | 16.8%            |
| Naturalness          | -14.6%           |
| Appearance           | -38.5%           |
| Environmental Impact | -40.3%           |
| Familiarity          | -41.1%           |
| Convenience          | -45.3%           |

Q7 What does it mean to you for a food to be called "natural"? (please type one or two words in the blank below)

<<see report for full analysis of this open ended question>>

Q8 What does it mean to you for a food to be called "healthy"? (please type one or two words in the blank below)

<<see report for full analysis of this open ended question>>

---

Start of Block: Natural

Q9 If a food was produced with the following processes or practices, would you consider the food to be natural or not natural?

|                                                                                          | Natural | Neither Natural or Not | Not Natural |
|------------------------------------------------------------------------------------------|---------|------------------------|-------------|
| Chopped (e.g., baby carrots, sliced apples, cut watermelon)                              | 76.9%   | 17.8%                  | 5.3%        |
| Vegetable oil from pressed grains like soybeans, corn, or canola                         | 51.3%   | 32.6%                  | 16.2%       |
| Fermentation (e.g., sauerkraut, yogurt, bread, beer)                                     | 50.4%   | 31.4%                  | 18.1%       |
| Preserved by canning, freezing, pasteurization, or smoking                               | 41.0%   | 35.1%                  | 23.9%       |
| Preserved with sugar, salt, or vinegar                                                   | 36.6%   | 31.7%                  | 31.7%       |
| Washing (e.g., cleaning grains or fruits and vegetables using organic acids or chlorine) | 36.2%   | 32.9%                  | 31.0%       |
| Extracted starch from corn, potatoes, or wheat                                           | 32.9%   | 38.9%                  | 28.2%       |
| Flavor enhanced with sugar, salt, or smoking                                             | 24.4%   | 31.6%                  | 44.1%       |
| Added enzymes to improve texture (e.g., in cheese or bread)                              | 11.9%   | 31.3%                  | 56.8%       |
| Appearance altered through decoloring or bleaching (e.g., flour, sugar, rice)            | 6.9%    | 21.2%                  | 71.9%       |
| Preserved with benzoates, nitrites, sulphites, or sorbates                               | 6.6%    | 19.6%                  | 73.8%       |
| Flavor enhanced with MSG, guanylic acid, or Monopotassium glutamate                      | 6.1%    | 15.1%                  | 78.9%       |

Q10 What does it mean to you for a food to be called "natural"? (check up to 3 items that most apply)

|                                      |       |
|--------------------------------------|-------|
| no preservatives                     | 58.8% |
| no hormones or antibiotics           | 53.5% |
| no pesticide residues                | 37.7% |
| fresh                                | 29.4% |
| organic                              | 26.0% |
| close to nature                      | 22.8% |
| few added ingredients                | 22.3% |
| foods my grandmother would recognize | 7.1%  |
| anything I could make in my kitchen  | 4.7%  |
| local                                | 4.1%  |
| uncooked                             | 3.0%  |

Q11 Which of the following foods or processes do you consider to be natural? (click up to 5 items on the image that you believe are natural)

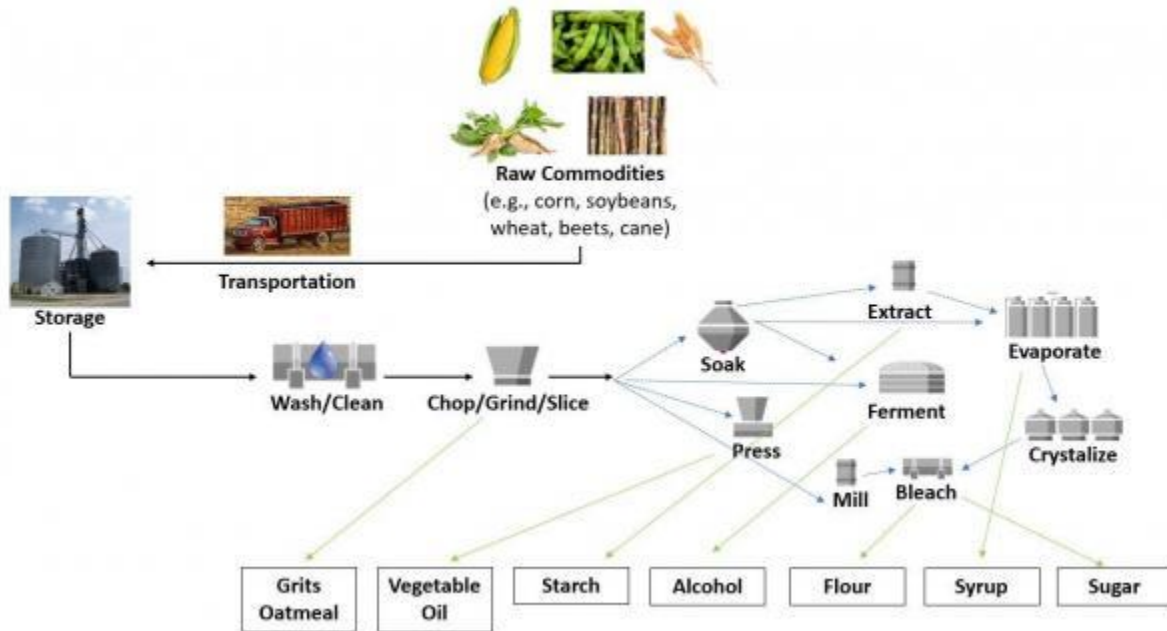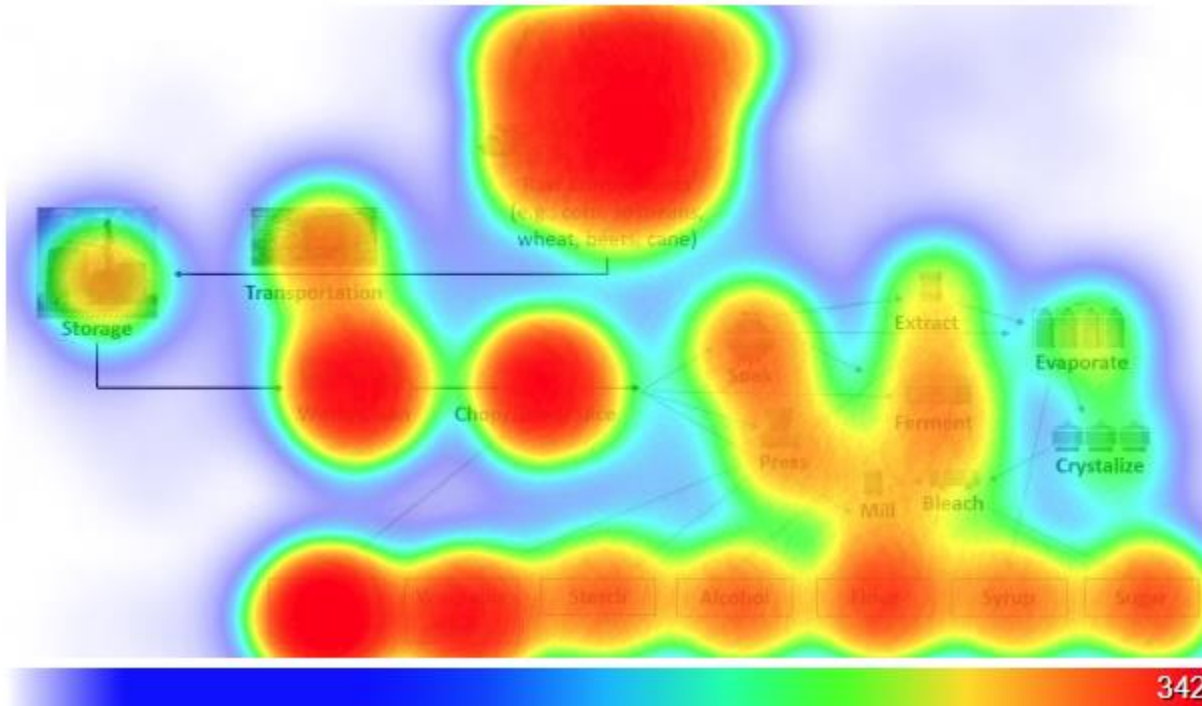

|                  |       |
|------------------|-------|
| Raw Commodity    | 47.1% |
| Grits/Oatmeal    | 28.9% |
| Wash/Clean       | 26.3% |
| Chop/Grind/Slice | 23.8% |
| Vegetable Oil    | 19.8% |
| Flour            | 13.3% |

342

|                |       |
|----------------|-------|
| Transportation | 12.9% |
| Starch         | 10.5% |
| Alcohol        | 10.2% |
| Soak           | 9.7%  |
| Sugar          | 8.6%  |
| Syrup          | 7.9%  |
| Storage        | 7.7%  |
| Ferment        | 7.1%  |
| Press          | 6.3%  |
| Extract        | 4.7%  |
| Mill           | 4.0%  |
| Evaporate      | 3.6%  |
| Crystalize     | 2.2%  |
| Bleach         | 1.2%  |

Q12 Which of the following foods or processes do you consider to be NOT natural? (click up to 5 items on the image that you believe are NOT natural)

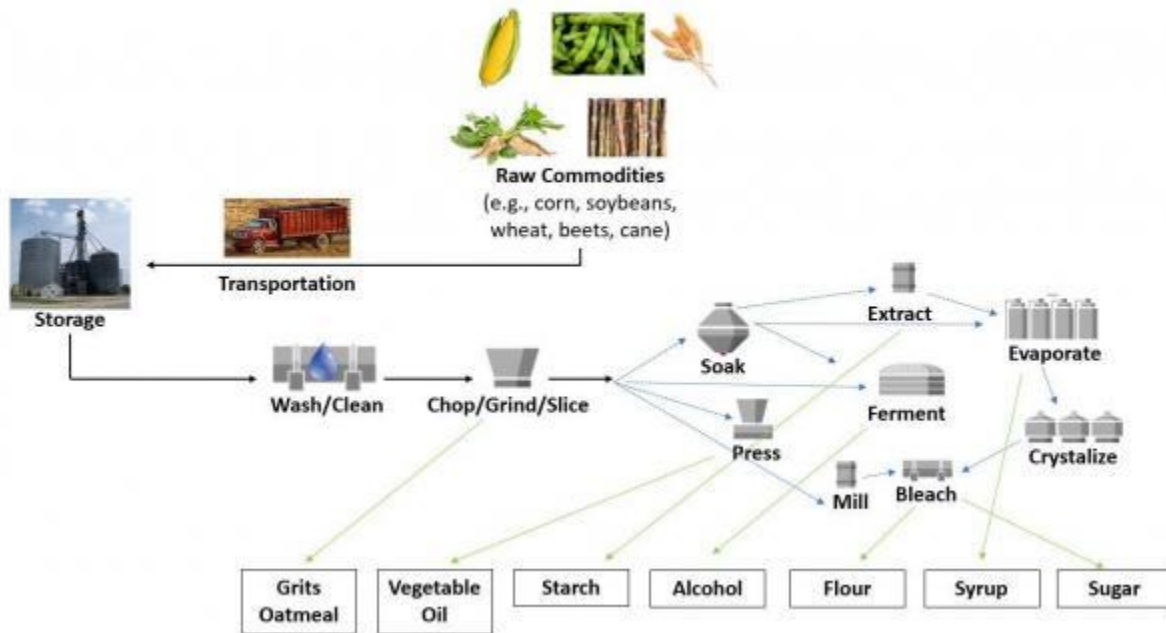

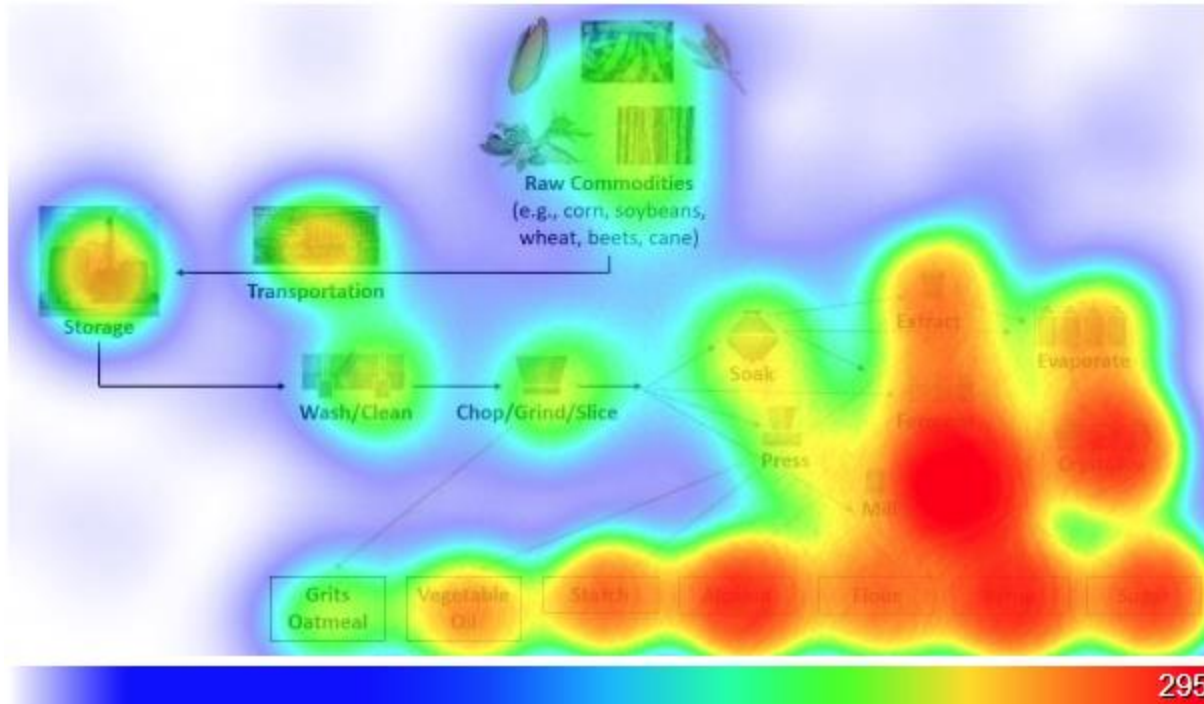

|                  |       |
|------------------|-------|
| Bleach           | 33.8% |
| Crystalize       | 22.2% |
| Alcohol          | 21.7% |
| Syrup            | 20.1% |
| Sugar            | 15.3% |
| Starch           | 13.4% |
| Flour            | 13.2% |
| Extract          | 12.0% |
| Ferment          | 11.7% |
| Vegetable Oil    | 10.7% |
| Storage          | 9.7%  |
| Evaporate        | 9.4%  |
| Transportation   | 9.2%  |
| Raw Commodity    | 5.4%  |
| Wash/Clean       | 5.1%  |
| Press            | 4.3%  |
| Chop/Grind/Slice | 4.0%  |
| Soak             | 3.9%  |
| Mill             | 3.7%  |
| Grits/Oatmeal    | 2.7%  |



Q13 If a food was produced from a grain, oilseed, fruit, or vegetable that was grown or farmed using the following processes or practices, would you consider the food to be natural or not natural?

|                                                                                     | Natural | Neither | Not Natural |
|-------------------------------------------------------------------------------------|---------|---------|-------------|
| organically grown crops                                                             | 83.3%   | 13.4%   | 3.4%        |
| crops grown indoors in greenhouses                                                  | 70.4%   | 23.9%   | 5.7%        |
| hydroponically grown crops                                                          | 44.3%   | 34.6%   | 21.1%       |
| hybrid seeds                                                                        | 29.1%   | 37.7%   | 33.2%       |
| crops sprayed with natural pesticides like copper sulfate or bacillus thuringiensis | 23.0%   | 32.6%   | 44.4%       |
| seeds created with genetic engineering or GMOs                                      | 11.6%   | 22.9%   | 65.5%       |
| seeds created using gene editing                                                    | 11.1%   | 27.5%   | 61.5%       |
| seeds created using mutagenesis                                                     | 9.5%    | 37.8%   | 52.7%       |
| crops sprayed with synthetic pesticides like glyphosate or chlorpyrifos             | 7.1%    | 17.7%   | 75.2%       |

Q14 To what extent do you agree or disagree with each of the following statements?

|                                            | Strongly Disagree | Somewhat Disagree | Neither Agree nor Disagree | Somewhat Agree | Strongly Agree |
|--------------------------------------------|-------------------|-------------------|----------------------------|----------------|----------------|
| Natural food is healthier                  | 2.7%              | 3.1%              | 17.4%                      | 39.9%          | 36.9%          |
| Natural food is better for the environment | 2.3%              | 4.5%              | 24.4%                      | 37.9%          | 31.0%          |
| Natural food is tastier                    | 4.0%              | 11.9%             | 40.2%                      | 25.7%          | 18.3%          |
| Natural food is more affordable            | 23.6%             | 36.9%             | 22.0%                      | 11.0%          | 6.5%           |
| Natural food is safer to eat               | 2.7%              | 4.8%              | 20.9%                      | 38.0%          | 33.5%          |
| Natural food is more convenient to eat     | 6.8%              | 21.1%             | 42.7%                      | 18.0%          | 11.4%          |
| Natural food is more sustainable           | 3.2%              | 9.7%              | 35.7%                      | 28.9%          | 22.4%          |

Q15 Currently, the Food and Drug Administration (FDA) does not define the term "natural" on food packages but food manufacturers are allowed to use the label. How do you believe natural labels should be regulated?

The FDA should regulate to use of the term "natural" by requiring companies to follow a uniform, consistent definition (65.7%)

The FDA should regulate to prevent the use of the term "natural" on food packages (21.5%)

The FDA should not regulate the use of the term "natural" on food packages (12.8%)

Q16 To what extent do you trust or distrust the FDA to define the term "natural" in a way that you would find useful in making food choices?

|                            |       |
|----------------------------|-------|
| Highly trust               | 10.0% |
| Somewhat trust             | 34.4% |
| Neither trust nor distrust | 33.0% |
| Somewhat distrust          | 14.9% |
| Highly distrust            | 7.7%  |

Q17 The U.S. Department of Agriculture (USDA) regulates the use of the label "natural" for meat. Which of the following best matches the current USDA definition for "natural" meat?

|                     |       |
|---------------------|-------|
| no hormones         | 31.3% |
| minimally processed | 26.6% |
| no antibiotics      | 23.8% |
| grass fed           | 14.5% |
| cage free           | 3.8%  |

---

**Start of Block: Healthy**

Q18 Do you consider each of the following foods to be healthy or unhealthy for you?

|                         | Healthy | Neither Healthy nor Unhealthy | Unhealthy |
|-------------------------|---------|-------------------------------|-----------|
| Fresh vegetables        | 96.2%   | 3.0%                          | 0.9%      |
| Fresh fruit             | 95.6%   | 3.9%                          | 0.5%      |
| Fish                    | 87.8%   | 10.2%                         | 2.1%      |
| Chicken                 | 79.5%   | 16.7%                         | 3.8%      |
| Eggs                    | 79.2%   | 18.2%                         | 2.6%      |
| Milk                    | 70.4%   | 22.6%                         | 7.0%      |
| Frozen vegetables       | 69.7%   | 26.6%                         | 3.7%      |
| Frozen fruit            | 63.8%   | 31.1%                         | 5.2%      |
| Cheese                  | 57.3%   | 33.3%                         | 9.5%      |
| Beef                    | 52.4%   | 35.1%                         | 12.6%     |
| Canned vegetables       | 43.2%   | 41.4%                         | 15.4%     |
| Canned fruit            | 37.3%   | 41.2%                         | 21.6%     |
| Vegetable oil           | 25.0%   | 49.2%                         | 25.8%     |
| Bakery and cereal items | 23.3%   | 43.7%                         | 33.0%     |
| Candy                   | 4.1%    | 16.1%                         | 79.8%     |

Q19 Which of the following affects whether or not you would consider a food healthy for you?  
*(check up to 3 items that most apply)*

|                                |       |
|--------------------------------|-------|
| sugar content                  | 23.7% |
| use of hormones or antibiotics | 23.5% |
| fat content                    | 19.2% |
| pesticide residues             | 18.4% |
| use of preservatives           | 15.9% |
| use of GMOs                    | 12.9% |
| number of calories             | 12.6% |
| organic                        | 10.9% |
| protein content                | 10.3% |
| vitamin content                | 9.0%  |
| use of processing              | 8.6%  |
| fiber content                  | 5.1%  |
| local                          | 2.7%  |
| none of the above              | 0.0%  |

Q20 Which of the following diseases or health conditions do you think would affect which foods you consider to be healthy? *(check up to 3 items that most apply)*

|                   |       |
|-------------------|-------|
| diabetes          | 63.3% |
| heart disease     | 54.8% |
| obesity           | 50.1% |
| food allergy      | 30.5% |
| cancer            | 29.5% |
| none of the above | 0.0%  |

Q21 Which of the following do you consider to be the most healthy for you?

|                    |       |
|--------------------|-------|
| Low sodium         | 66.8% |
| Medium low sodium  | 19.7% |
| Medium sodium      | 11.4% |
| Medium high sodium | 1.6%  |
| High sodium        | 0.6%  |

Q22 Which of the following do you consider to be the most healthy for you?

|                           |       |
|---------------------------|-------|
| Low carbohydrates         | 42.6% |
| Medium low carbohydrates  | 22.5% |
| Medium carbohydrates      | 28.3% |
| Medium high carbohydrates | 4.0%  |
| High carbohydrates        | 2.6%  |

Q23 Which of the following do you consider to be the most healthy for you?

|                 |       |
|-----------------|-------|
| Low fat         | 53.5% |
| Medium low fat  | 21.9% |
| Medium fat      | 18.5% |
| Medium high fat | 4.3%  |
| High fat        | 1.8%  |

Q24 Which of the following do you consider to be the most healthy for you?

|                     |       |
|---------------------|-------|
| Low protein         | 3.2%  |
| Medium low protein  | 4.4%  |
| Medium protein      | 24.1% |
| Medium high protein | 24.9% |
| High protein        | 43.5% |

Q25 Which of the following statements best matches your view?

If I know the nutrient content of the food (the amount of fat, protein, carbs, vitamins, etc.), I know enough to decide whether a food is healthy (52.1%)

I need to know more than just the nutrient content (the amount of fat, protein, carbs, vitamins, etc.) of a food to decide whether it is healthy (47.9%)

Q26 Which of the following statements best matches your view?

It is better to think about "healthy" on a food-by-food basis (some foods are healthy and some aren't) (47.9%)

It is better to think about "healthy" by looking at a whole dietary pattern (healthiness is defined by combinations of foods in a diet) (52.1%)

Q27 If a food is labeled "healthy", what would that mean to you? (*check up to 3 items that most apply*)

|                                                    |       |
|----------------------------------------------------|-------|
| I should increase consumption of this type of food | 39.5% |
|----------------------------------------------------|-------|

|                                                      |       |
|------------------------------------------------------|-------|
| I shouldn't avoid this type of food                  | 36.2% |
| It wouldn't mean anything to me                      | 34.7% |
| I can eat all I want                                 | 15.5% |
| My diet isn't healthy unless I eat this type of food | 13.4% |
| I should reduce consumption of this type of food     | 7.7%  |

Q28 To what extent do you agree or disagree with each of the following statements?

|                                                                                | Strongly Disagree | Somewhat Disagree | Neither Agree nor Disagree | Somewhat Agree | Strongly Agree |
|--------------------------------------------------------------------------------|-------------------|-------------------|----------------------------|----------------|----------------|
| Healthy food is safer to eat                                                   | 2.3%              | 4.8%              | 26.0%                      | 39.5%          | 27.5%          |
| Individual needs determine whether various foods are healthy for an individual | 1.4%              | 6.4%              | 21.2%                      | 43.8%          | 27.2%          |
| Healthy food is more natural                                                   | 2.9%              | 5.5%              | 24.4%                      | 41.5%          | 25.7%          |
| Healthy food is better for the environment                                     | 3.5%              | 5.5%              | 38.3%                      | 30.6%          | 22.1%          |
| Healthy food is more sustainable                                               | 2.7%              | 9.2%              | 40.2%                      | 29.8%          | 18.1%          |
| Healthy food is tastier                                                        | 5.7%              | 16.4%             | 43.9%                      | 20.7%          | 13.4%          |
| Healthy food is more convenient to eat                                         | 9.2%              | 24.1%             | 42.2%                      | 14.4%          | 10.1%          |
| Healthy food is more affordable                                                | 22.3%             | 35.5%             | 27.8%                      | 7.6%           | 6.8%           |

Q29 Currently, the Food and Drug Administration (FDA) allows the label "healthy" to be used on foods low in fat and saturated fat and that provide at least 10% of recommended amounts of vitamin A, vitamin C, calcium, iron, protein, or fiber.

How do you believe healthy labels should be regulated in the future?

|                                                                                                                      |       |
|----------------------------------------------------------------------------------------------------------------------|-------|
| The FDA should regulate the use of the term "healthy" by requiring companies follow a uniform, consistent definition | 54.2% |
| The FDA should keep the current definition of "healthy"                                                              | 19.3% |
| The FDA should regulate to prevent the use of the term "healthy" on food packages                                    | 17.2% |
| The FDA should not regulate the use of the term "healthy" on food packages                                           | 9.3%  |

Q30 To what extent do you trust or distrust the FDA to define the term "healthy" in a way that you would find useful in making food choices?

|                            |       |
|----------------------------|-------|
| Highly trust               | 8.9%  |
| Somewhat trust             | 37.3% |
| Neither trust nor distrust | 31.1% |
| Somewhat distrust          | 15.8% |
| Highly distrust            | 7.0%  |

---

Start of Block: Ingredients

Q31 Which of the two words below would you find more informative if you saw it on an ingredient list of a food package? *(Both words mean the same thing but one is the precise scientific description the other is the common usage)*

Maltodextrin (10.9%)

Corn starch (89.1%)

Q32 Which of the two words below would you find more informative if you saw it on an ingredient list of a food package? *(Both words mean the same thing but one is the precise scientific description the other is the common usage)*

Pyridoxine (9.7%)

Vitamin B-6 (90.3%)

Q33 Which of the two words below would you find more informative if you saw it on an ingredient list of a food package? *(Both words mean the same thing but one is the precise scientific description the other is the common usage)*

Resistant maltodextrin (13.4%)

Soluble corn fiber (86.6%)

<<There are 10 sets of questions, asking respondents to indicate the most and least attractive areas of a cereal box in addition to their purchase intention. Respondents were randomly assigned to answer 2 of the 10 sets of questions.>>

Which Area of the Box is Most Attractive?

| Question Set | Price  | Label(s)                      | % of Respondents Clicking on Area of the Box |       |            |
|--------------|--------|-------------------------------|----------------------------------------------|-------|------------|
|              |        |                               | Label                                        | Price | Other Area |
| 1            | \$2.98 | none                          | 1.3%                                         | 27.6% | 71.1%      |
| 2            | \$4.98 | none                          | 0.8%                                         | 57.9% | 41.3%      |
| 3            | \$2.98 | natural                       | 17.7%                                        | 29.0% | 53.4%      |
| 4            | \$4.98 | natural                       | 14.6%                                        | 49.4% | 36.0%      |
| 5            | \$2.98 | healthy                       | 22.6%                                        | 21.7% | 55.7%      |
| 6            | \$4.98 | healthy                       | 19.3%                                        | 44.2% | 36.4%      |
| 7            | \$2.98 | organic                       | 19.3%                                        | 27.0% | 53.8%      |
| 8            | \$4.98 | organic                       | 11.7%                                        | 39.8% | 48.5%      |
| 9            | \$2.98 | natural, healthy, and organic | 33.4%                                        | 23.2% | 43.5%      |
| 10           | \$4.98 | natural, healthy, and organic | 27.1%                                        | 39.7% | 33.2%      |

Which Area of the Box is Least Attractive?

| Question Set | Price  | Label(s)                      |  | % of Respondents Clicking on Area of the Box |       |            |
|--------------|--------|-------------------------------|--|----------------------------------------------|-------|------------|
|              |        |                               |  | Label                                        | Price | Other Area |
| 1            | \$2.98 | none                          |  | 87.7%                                        | 1.5%  | 10.9%      |
| 2            | \$4.98 | none                          |  | 98.5%                                        | 0.0%  | 1.6%       |
| 3            | \$2.98 | natural                       |  | 66.0%                                        | 24.8% | 9.2%       |
| 4            | \$4.98 | natural                       |  | 71.2%                                        | 26.5% | 2.3%       |
| 5            | \$2.98 | healthy                       |  | 68.4%                                        | 21.5% | 10.2%      |
| 6            | \$4.98 | healthy                       |  | 76.4%                                        | 21.7% | 1.9%       |
| 7            | \$2.98 | organic                       |  | 64.8%                                        | 28.5% | 6.7%       |
| 8            | \$4.98 | organic                       |  | 65.3%                                        | 33.0% | 1.7%       |
| 9            | \$2.98 | natural, healthy, and organic |  | 53.2%                                        | 43.4% | 3.5%       |
| 10           | \$4.98 | natural, healthy, and organic |  | 55.7%                                        | 41.9% | 2.4%       |

Purchase Intention

| Question Set | Price  | Label(s)                      |  | Likelihood of purchase (0 = no chance of buying; 100 = 100% chance of buying) |        |       |
|--------------|--------|-------------------------------|--|-------------------------------------------------------------------------------|--------|-------|
|              |        |                               |  | Mean                                                                          | Median | Stdev |
| 1            | \$2.98 | none                          |  | 37.8                                                                          | 35     | 29.1  |
| 2            | \$4.98 | none                          |  | 34.9                                                                          | 30     | 27.2  |
| 3            | \$2.98 | natural                       |  | 45.3                                                                          | 50     | 28.6  |
| 4            | \$4.98 | natural                       |  | 36.7                                                                          | 39     | 25.6  |
| 5            | \$2.98 | healthy                       |  | 43.1                                                                          | 50     | 28.0  |
| 6            | \$4.98 | healthy                       |  | 38.2                                                                          | 37     | 28.3  |
| 7            | \$2.98 | organic                       |  | 44.1                                                                          | 49     | 26.9  |
| 8            | \$4.98 | organic                       |  | 42.2                                                                          | 49     | 27.7  |
| 9            | \$2.98 | natural, healthy, and organic |  | 44.0                                                                          | 49     | 30.3  |
| 10           | \$4.98 | natural, healthy, and organic |  | 41.0                                                                          | 40     | 27.9  |



---

Start of Block: Cereal1 Control Low Price

Q34 Which part of the cereal box below is most attractive to you? (please click or touch the image in the most attractive location)

# Cereal

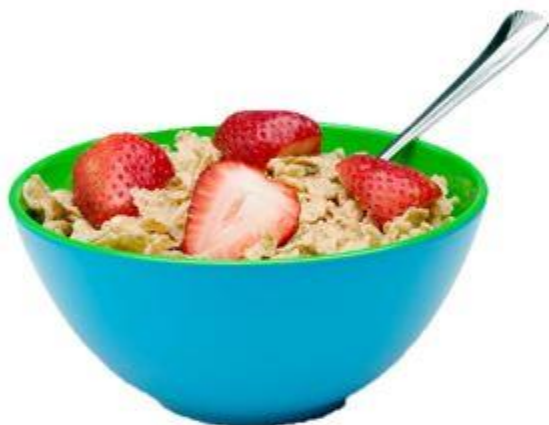

Net Wt. 1lb (16 oz)

**\$2.98**

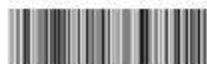

# Cereal

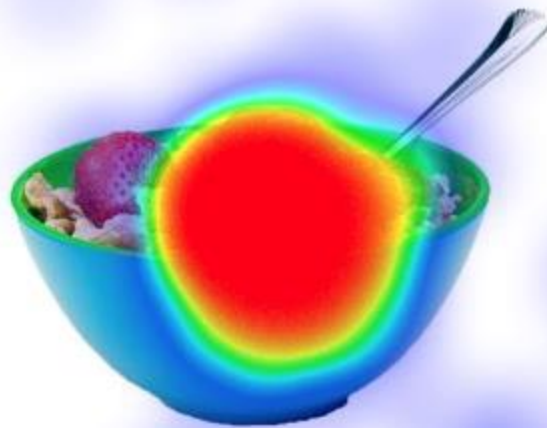

Net Wt. 1lb (16 oz)

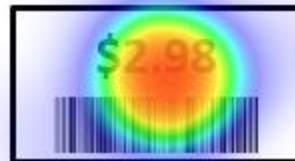

Q35 Which part of the cereal box below is least attractive to you? (please click or touch the image in the most attractive location)

# Cereal

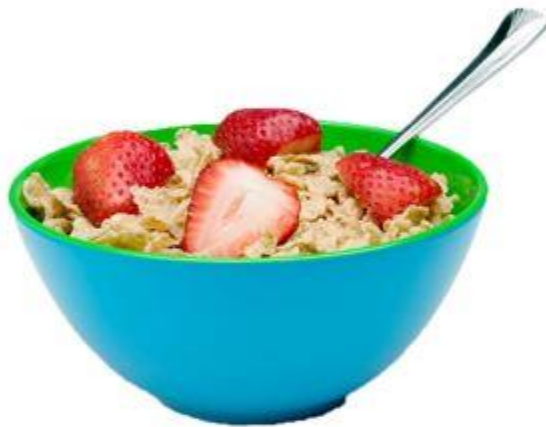

Net Wt. 1lb (16 oz)

**\$2.98**

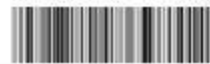

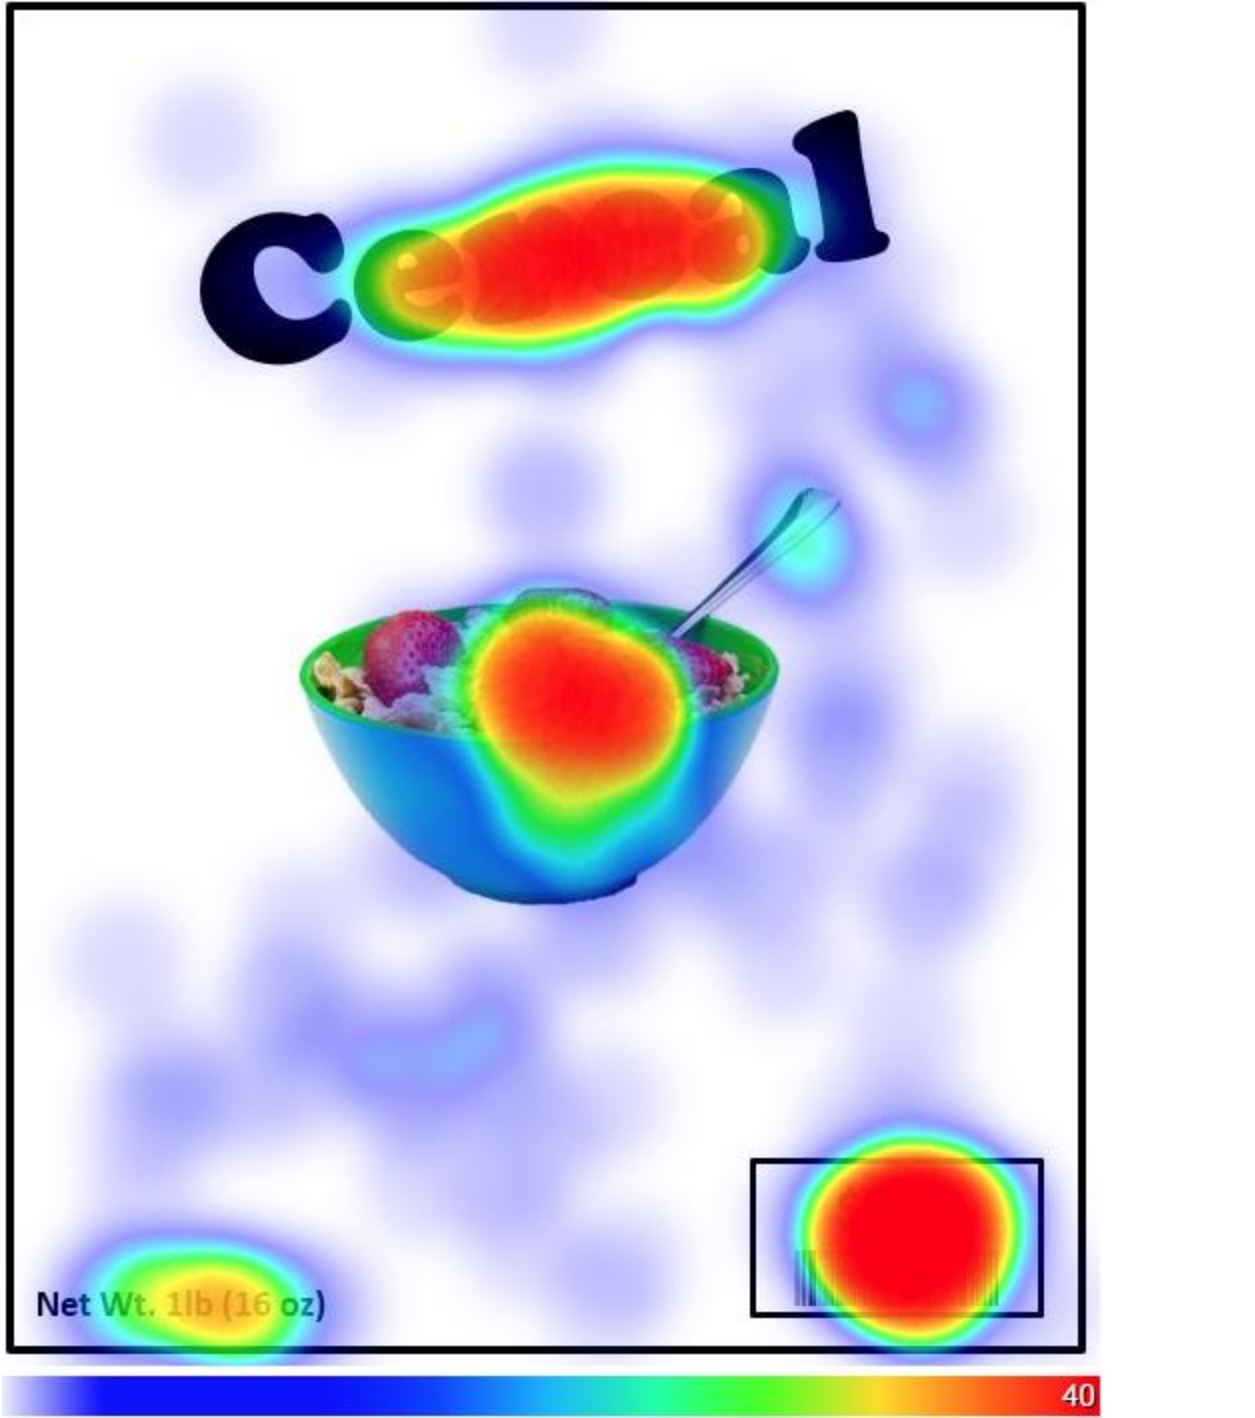

Q36 If you encountered this box of cereal in the grocery store, how likely would you be to purchase it? (0 = no chance of buying; 100 = 100% chance of buying)

0%=Very unlikely      Very likely=100%

0 10 20 30 40 50 60 70 80 90 100

---

. ()

---

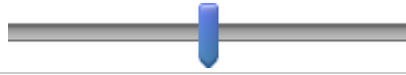

---

Start of Block: cereal2\_control\_high

**Q37 Which part of the cereal box below is most attractive to you? (please click or touch the image in the most attractive location)**

# Cereal

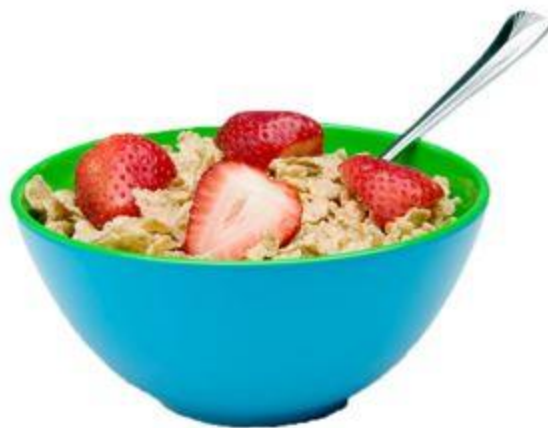

Net Wt. 1lb (16 oz)

**\$4.98**

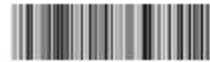

# Cereal

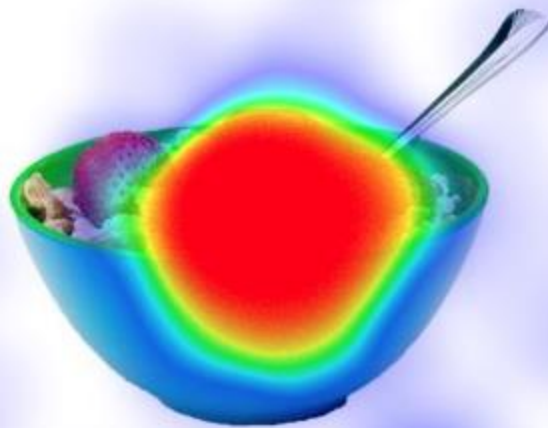

Net Wt. 1lb (16 oz)

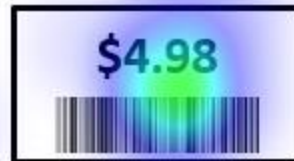

86



Q38 Which part of the cereal box below is least attractive to you? (please click or touch the image in the most attractive location)

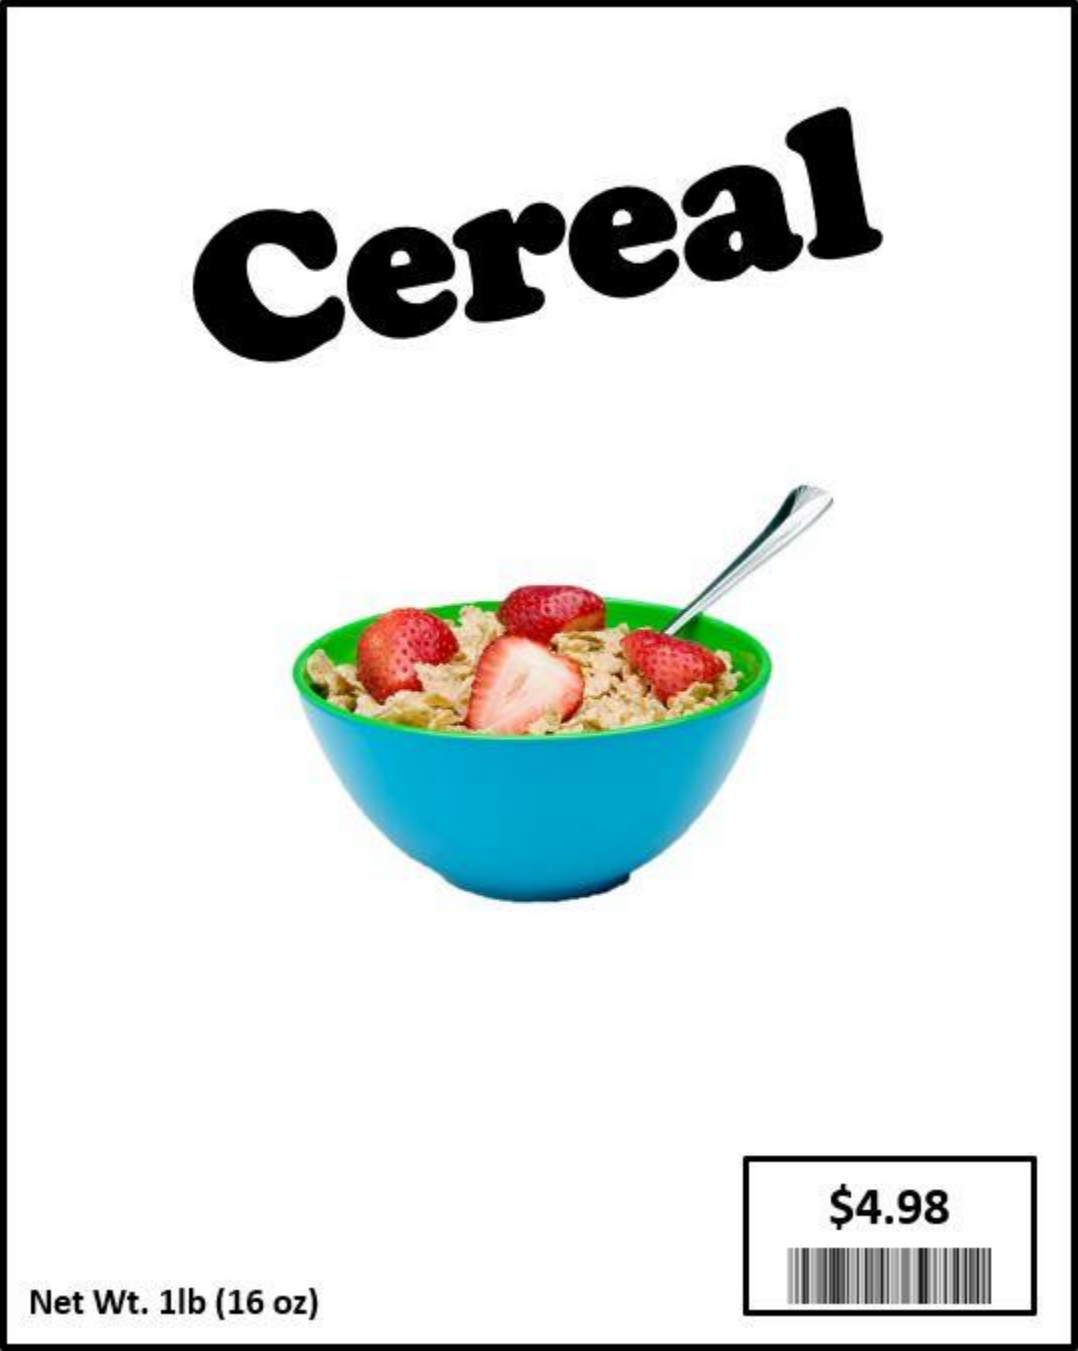

# Cereal

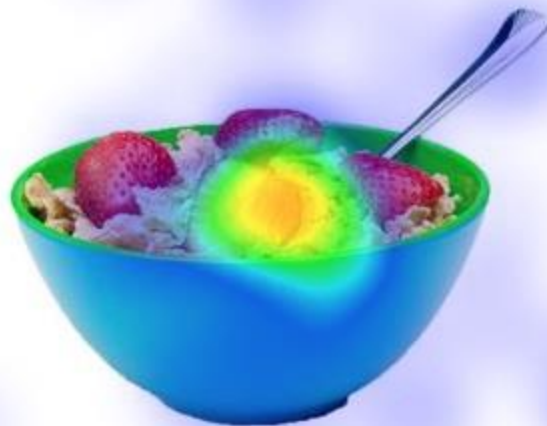

Net Wt. 1lb (16 oz)

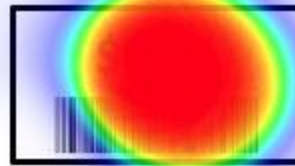

79

Q39 If you encountered this box of cereal in the grocery store, how likely would you be to purchase it? (0 = no chance of buying; 100 = 100% chance of buying)  
End of Block: cereal2\_control\_high

Start of Block: cherrio3\_natural\_low

Q40 Which part of the cereal box below is most attractive to you? (please click or touch the image in the most attractive location)

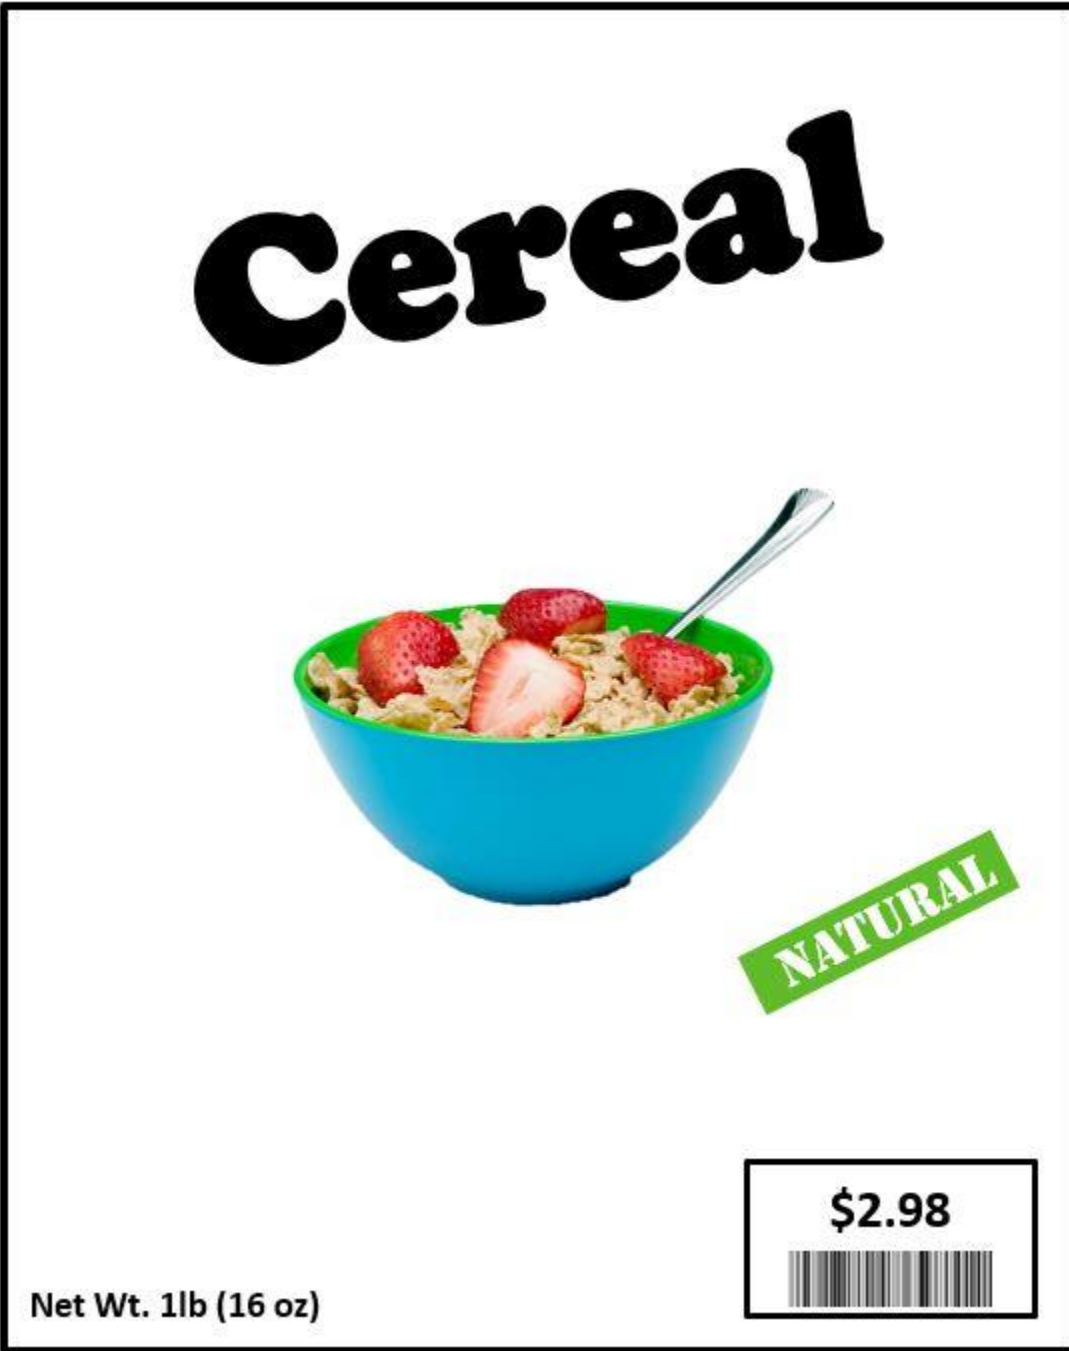

# Cereal

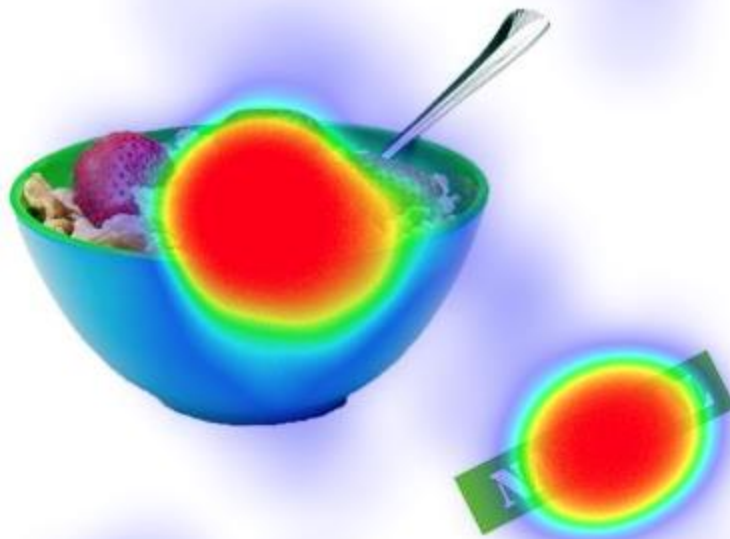

Net Wt. 1lb (16 oz)

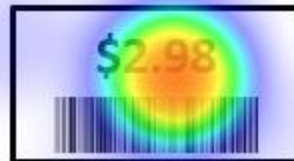

Q41 Which part of the cereal box below is least attractive to you? (please click or touch the image in the most attractive location)



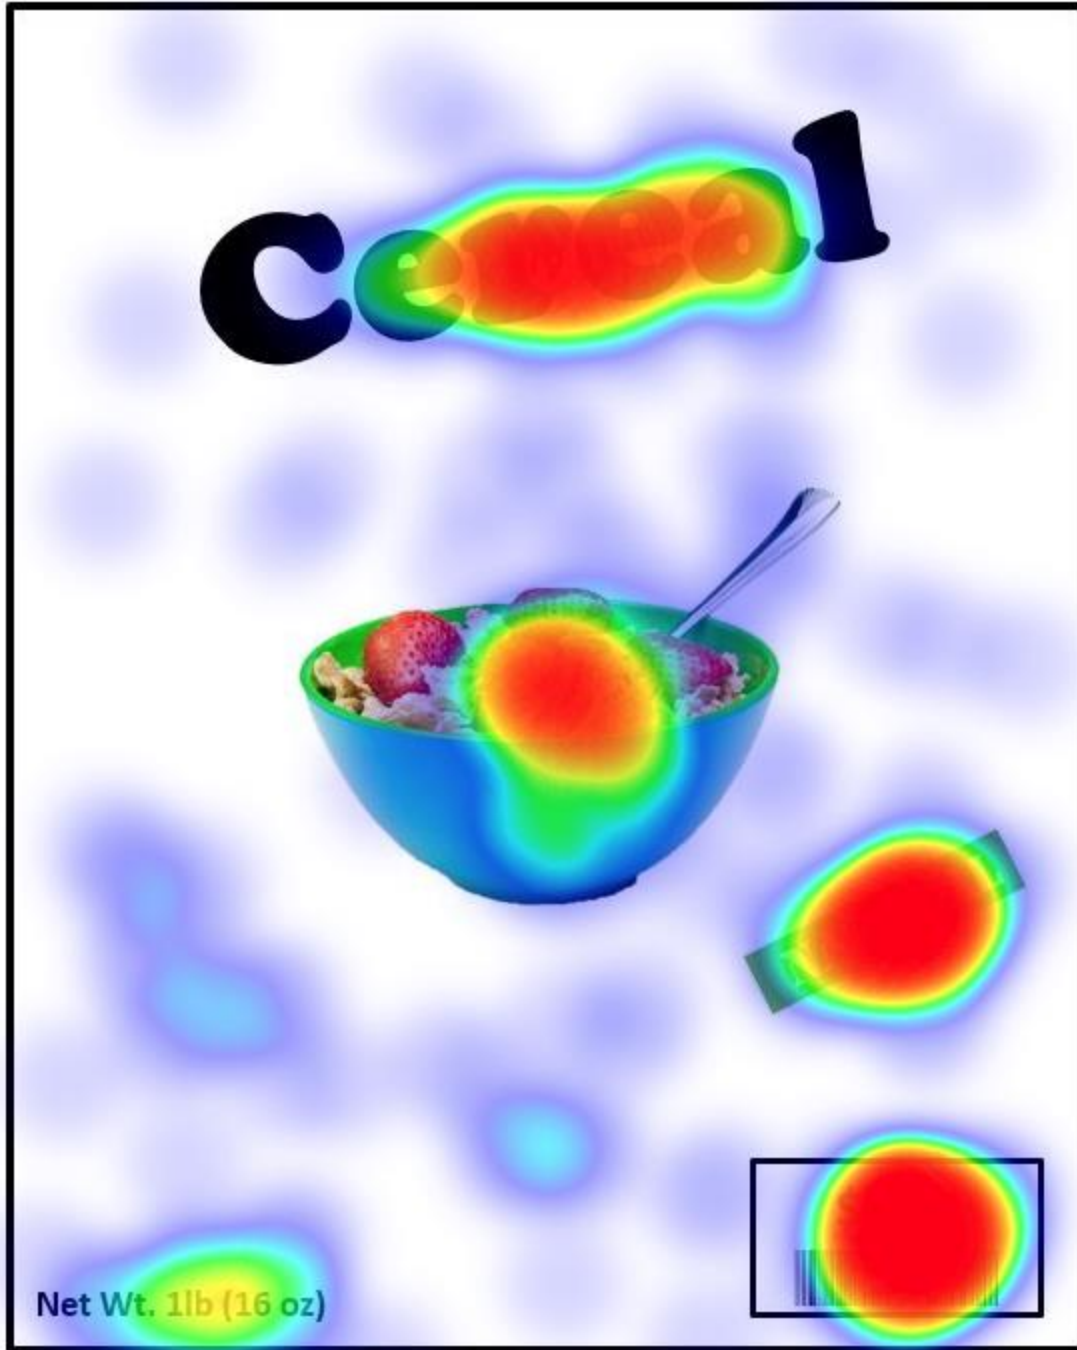

Q42 If you encountered this box of cereal in the grocery store, how likely would you be to purchase it? (0 = no chance of buying; 100 = 100% chance of buying)

End of Block: cherrio3\_natural\_low

Start of Block: cereal4\_natural\_high

Q43 Which part of the cereal box below is most attractive to you? (please click or touch the image in the most attractive location)

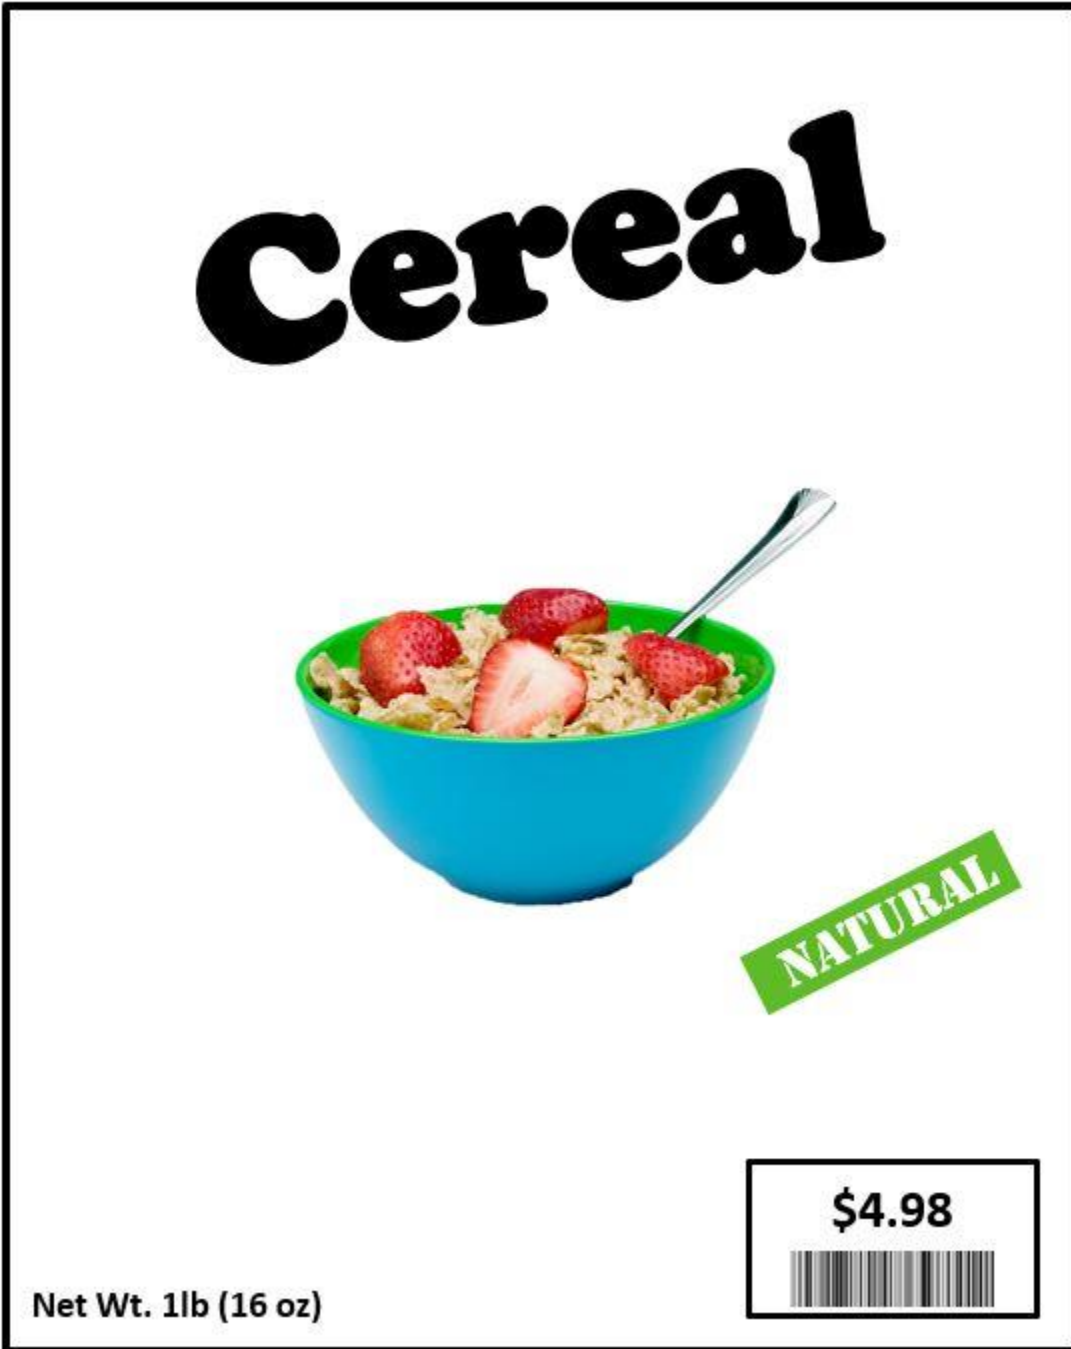

# Cereal

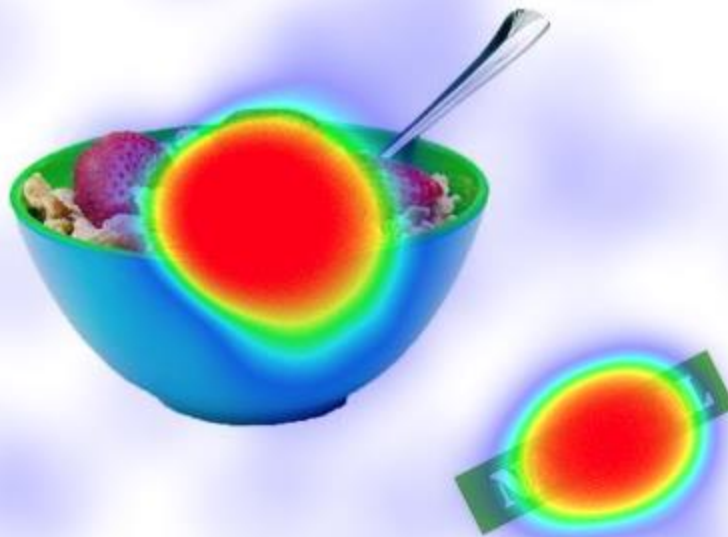

Net Wt. 1lb (16 oz)

\$4.98

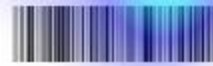

77



Q44 Which part of the cereal box below is least attractive to you? (please click or touch the image in the most attractive location)



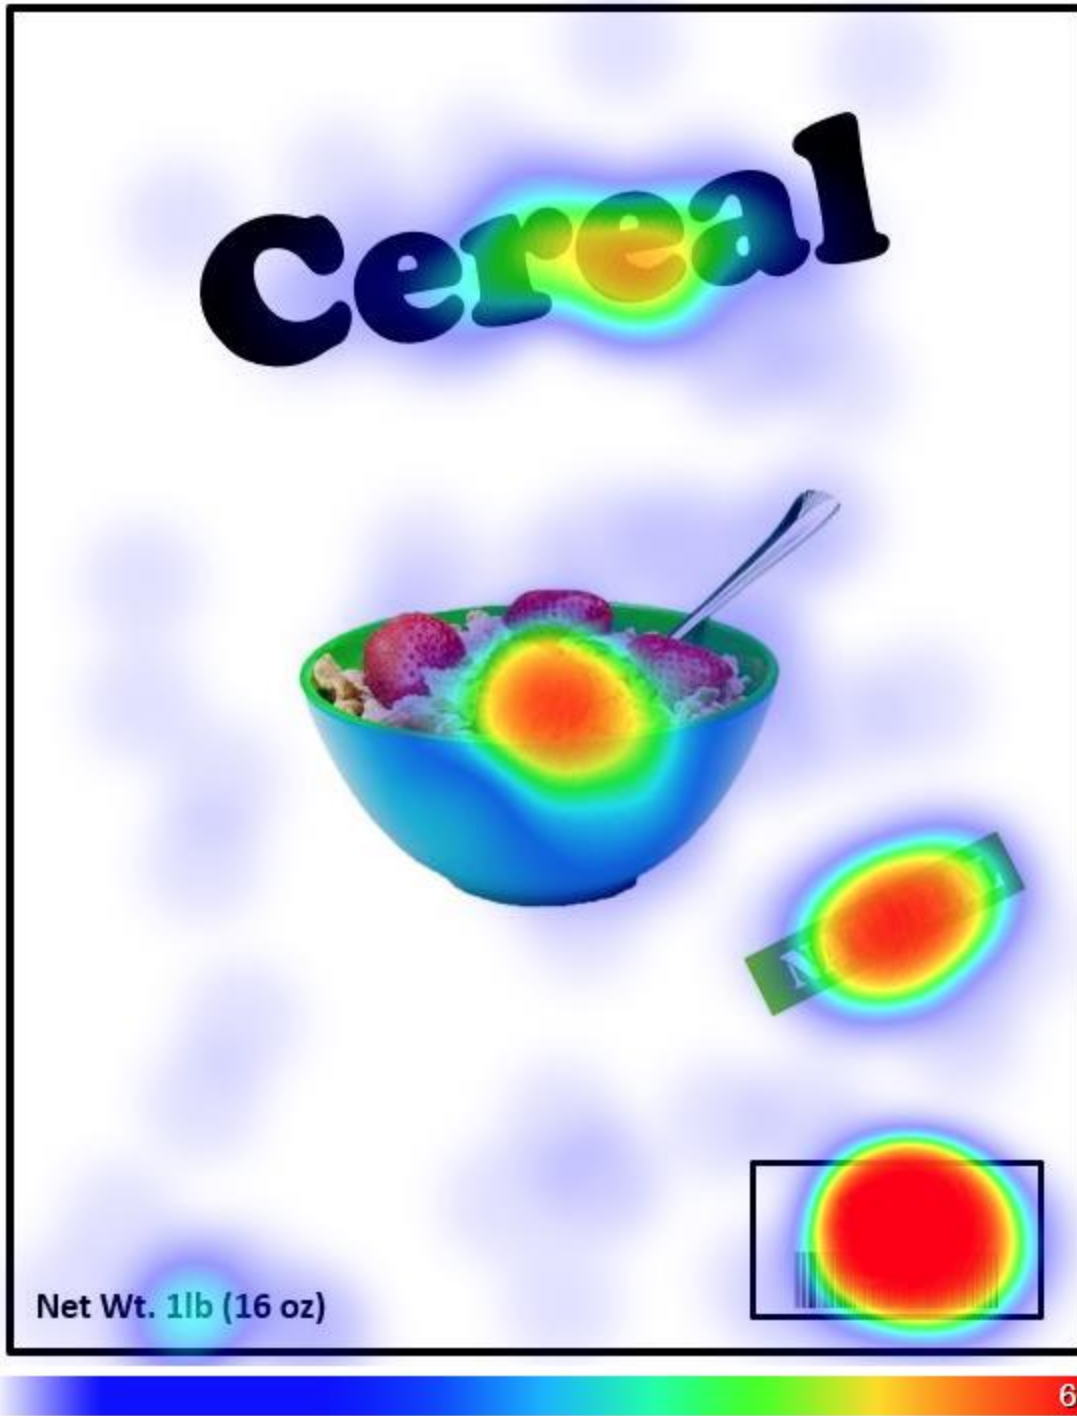

Q45 If you encountered this box of cereal in the grocery store, how likely would you be to purchase it? (0 = no chance of buying; 100 = 100% chance of buying)

End of Block: cereal4\_natural\_high

Start of Block: cereal5\_health\_low

Q46 Which part of the cereal box below is most attractive to you? (please click or touch the image in the most attractive location)

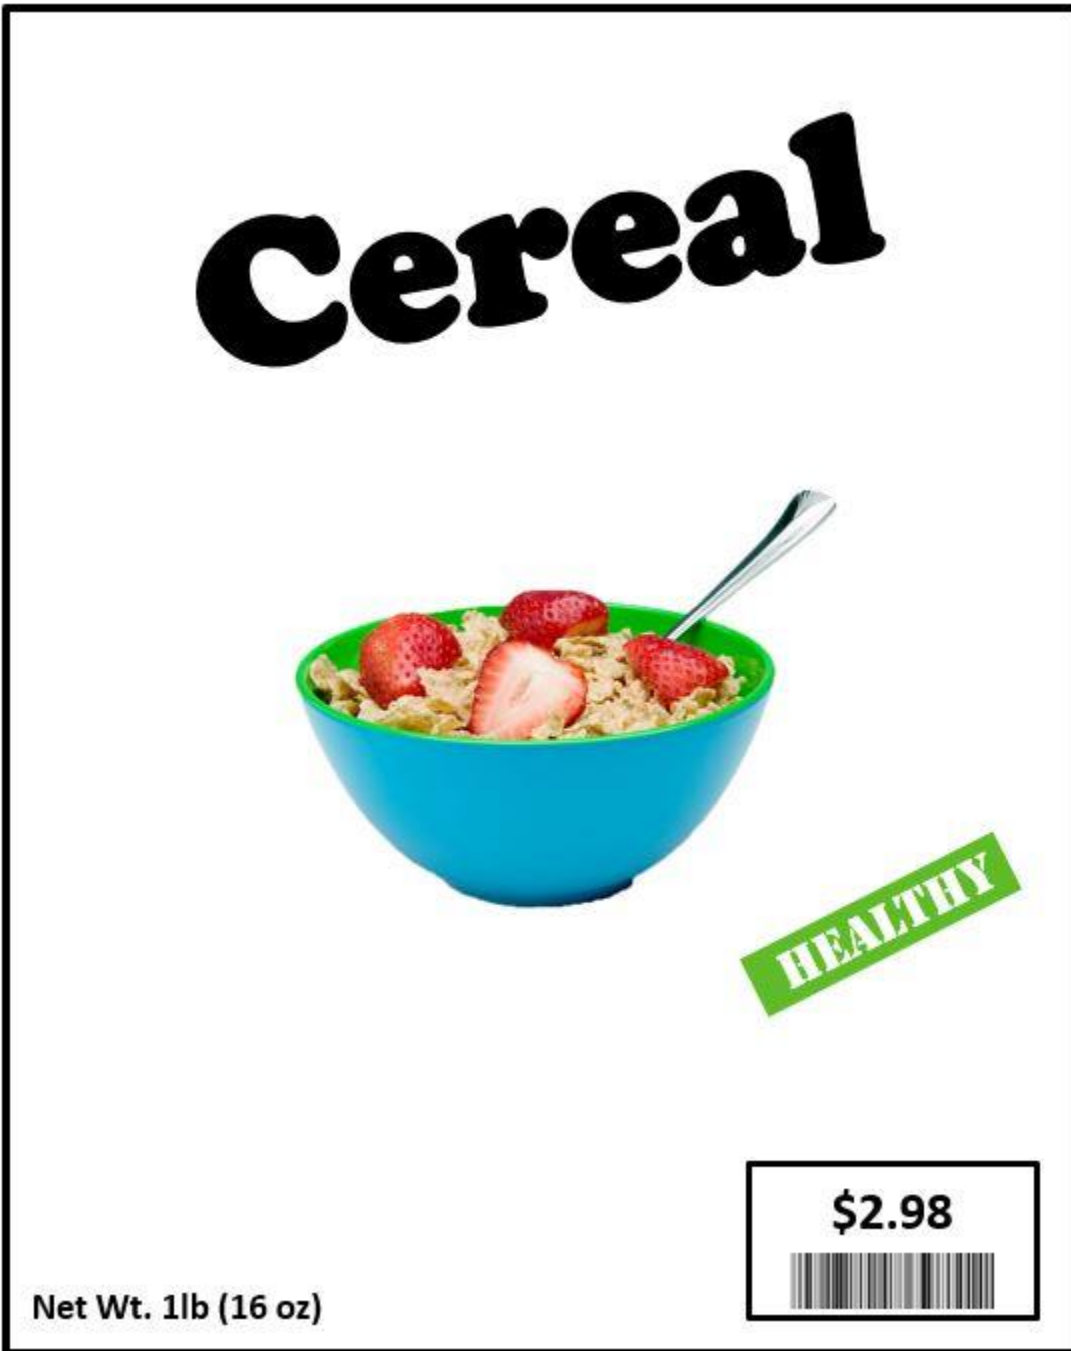

# Cereal

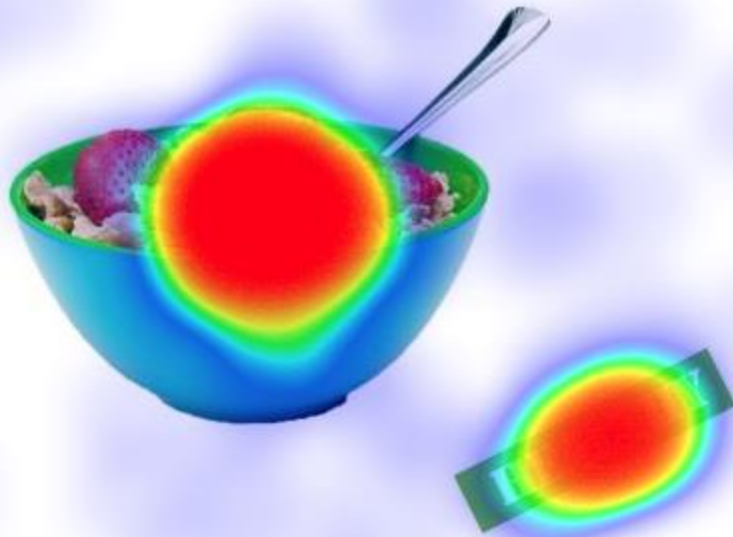

Net Wt. 1lb (16 oz)

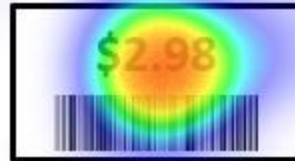

Q47 Which part of the cereal box below is least attractive to you? (please click or touch the image in the most attractive location)



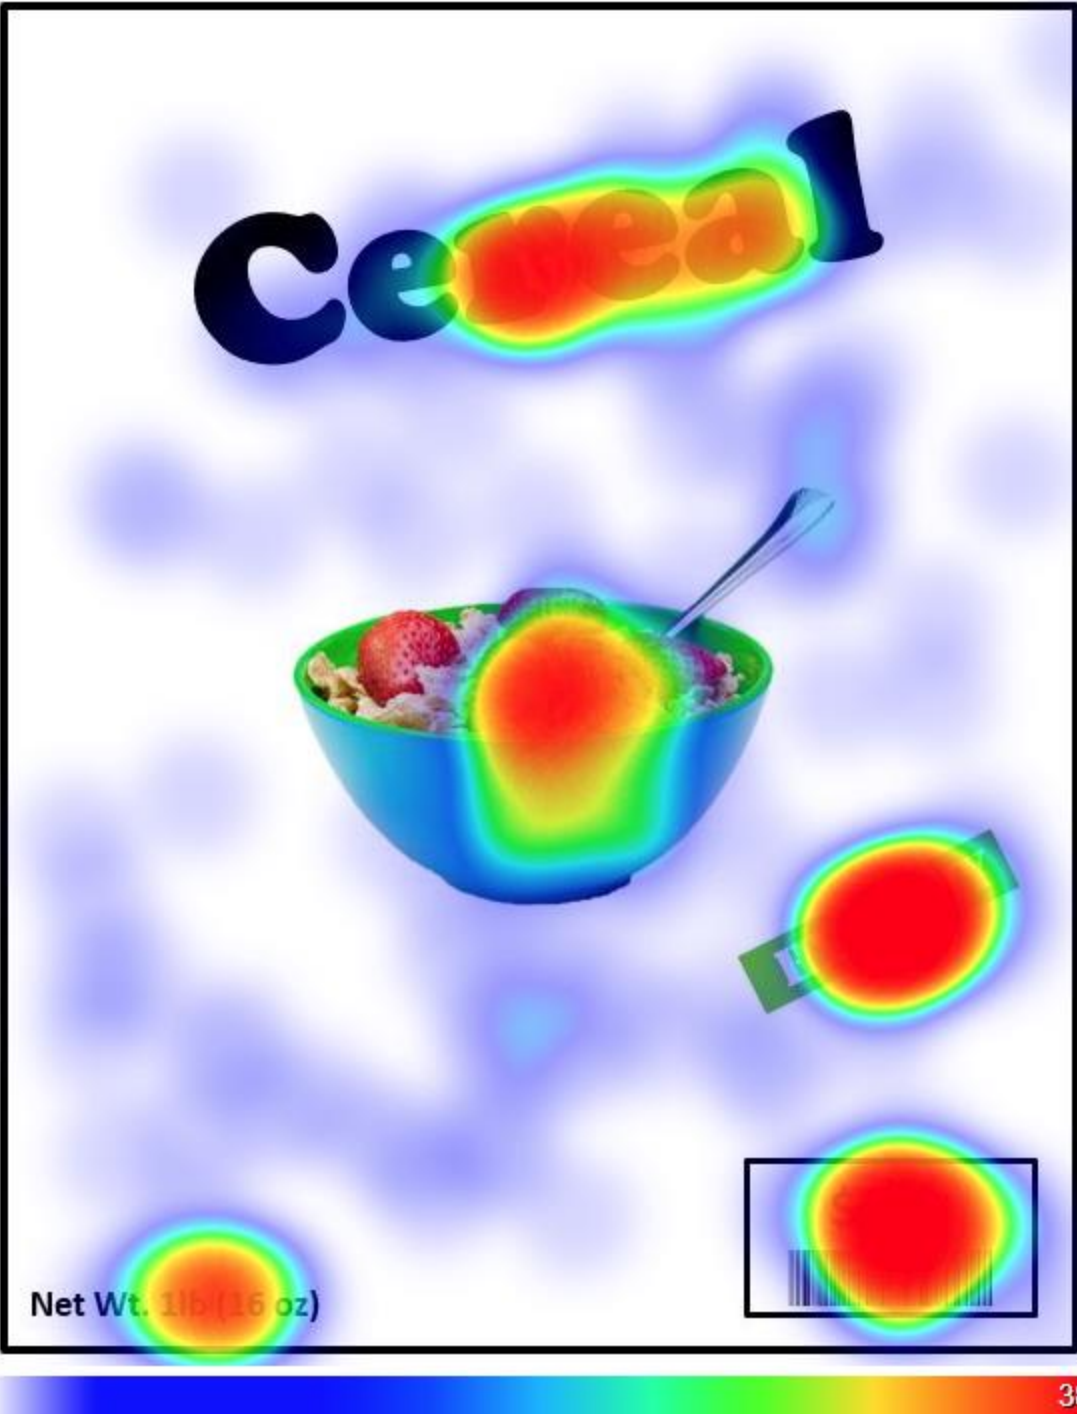

Q48 If you encountered this box of cereal in the grocery store, how likely would you be to purchase it? (0 = no chance of buying; 100 = 100% chance of buying)

End of Block: cereal5\_health\_low

Start of Block: cereal6\_health\_hi

Q49 Which part of the cereal box below is most attractive to you? (please click or touch the image in the most attractive location)

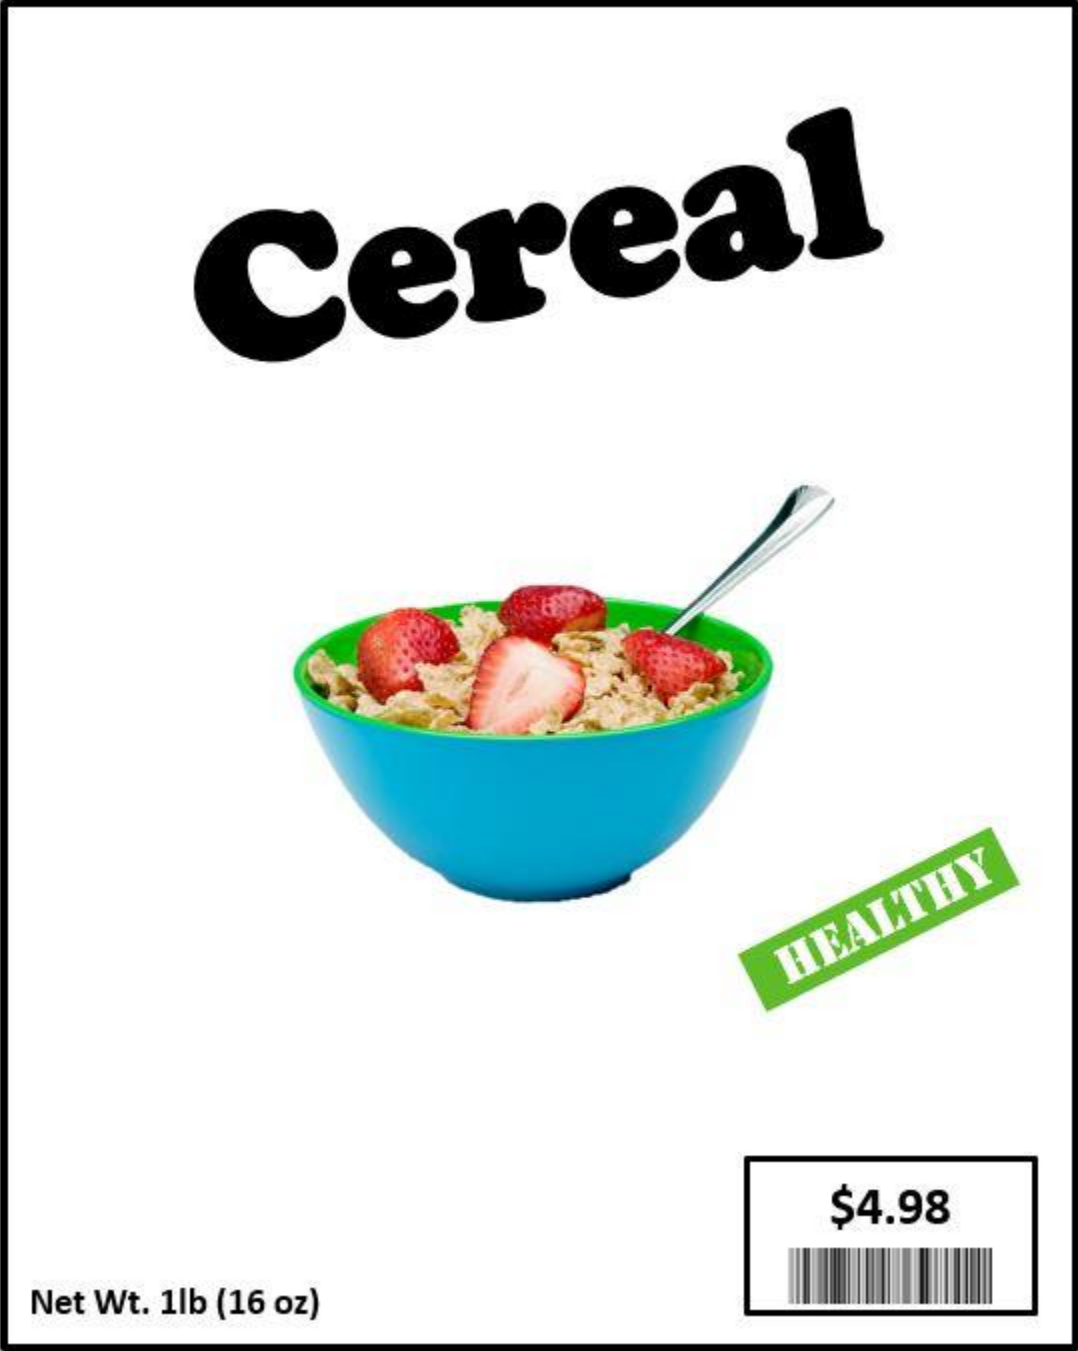

# Cereal

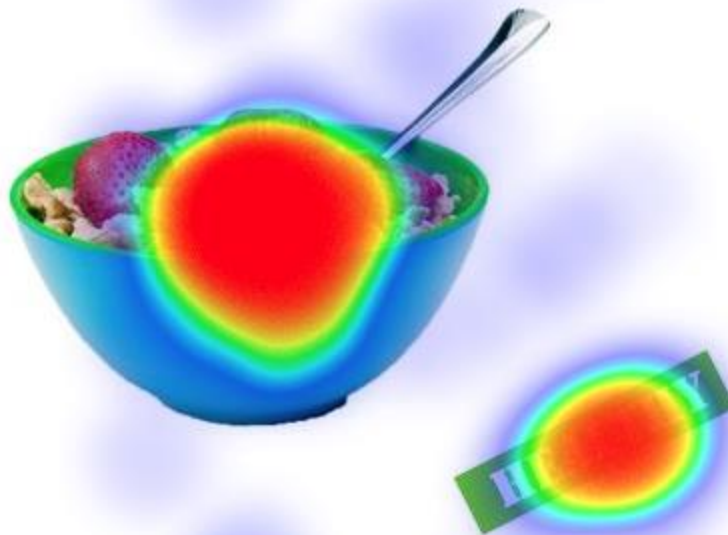

Net Wt. 1lb (16 oz)

\$4.98

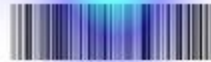



Q50 Which part of the cereal box below is least attractive to you? (please click or touch the image in the most attractive location)

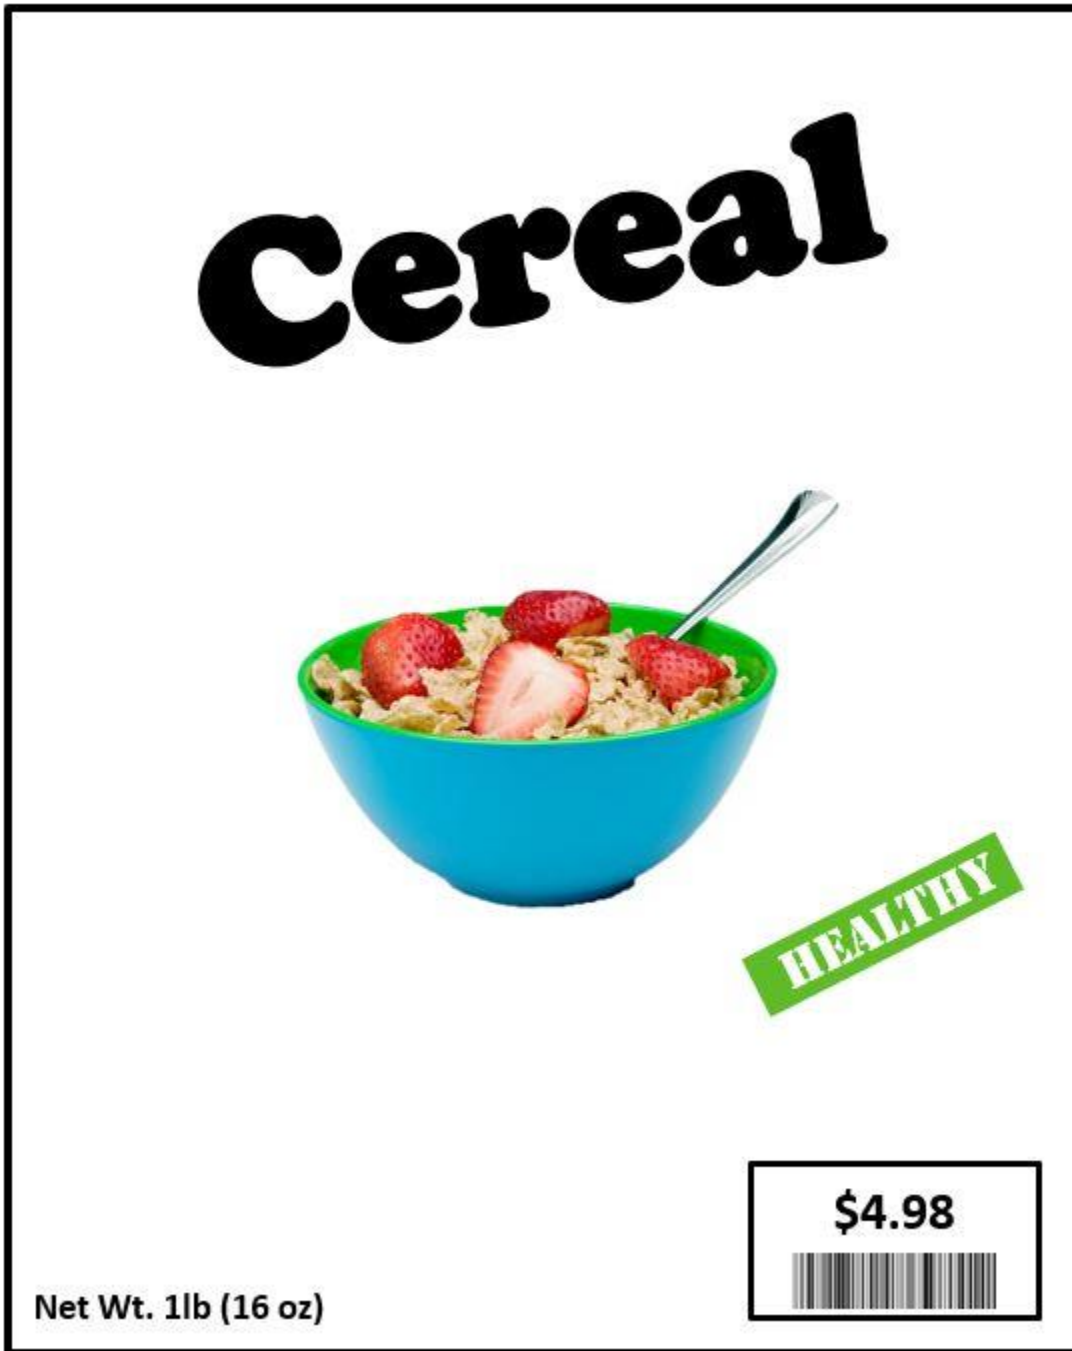

# Cereal

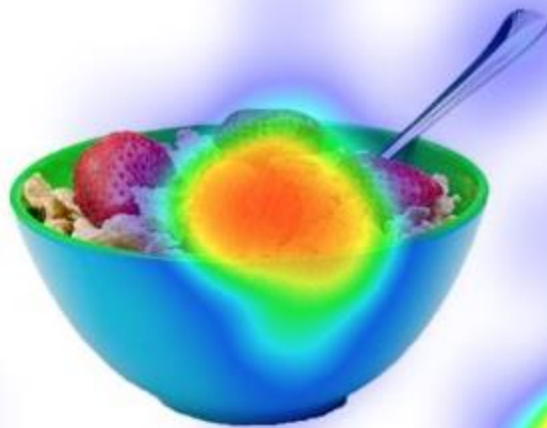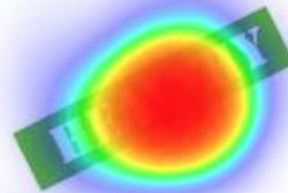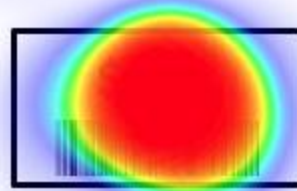

Net Wt. 1lb (16 oz)

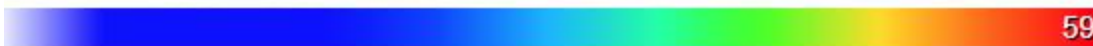

Q51 If you encountered this box of cereal in the grocery store, how likely would you be to purchase it? (0 = no chance of buying; 100 = 100% chance of buying)

End of Block: cereal6\_health\_hi

Start of Block: cereal7\_organic\_low

Q52 Which part of the cereal box below is most attractive to you? (please click or touch the image in the most attractive location)

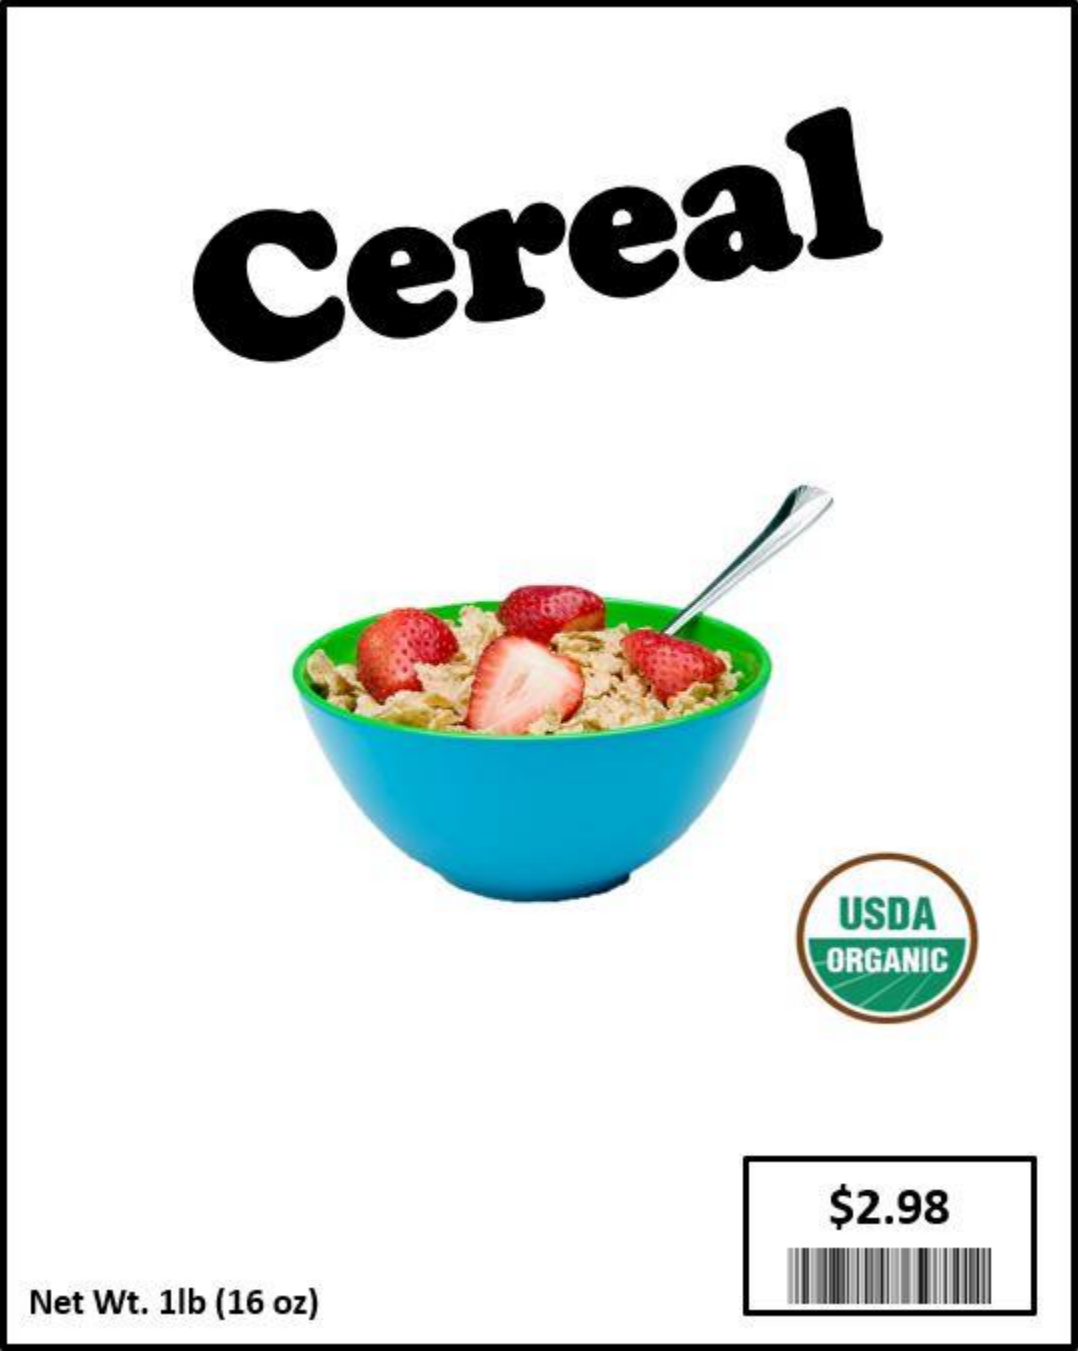

# Cereal

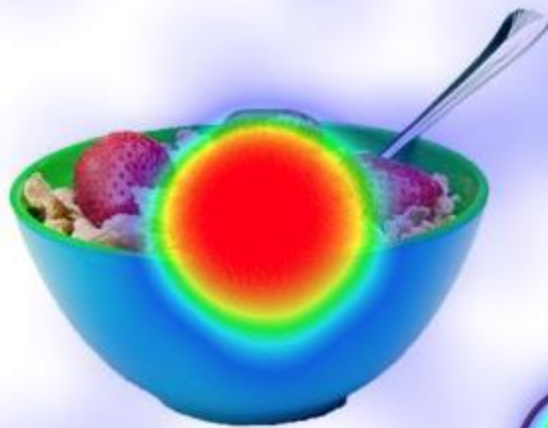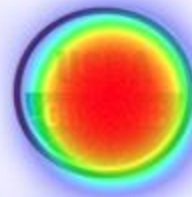

\$2.98

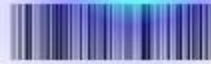

Net Wt. 1lb (16 oz)

80

Q53 Which part of the cereal box below is least attractive to you? (please click or touch the image in the most attractive location)



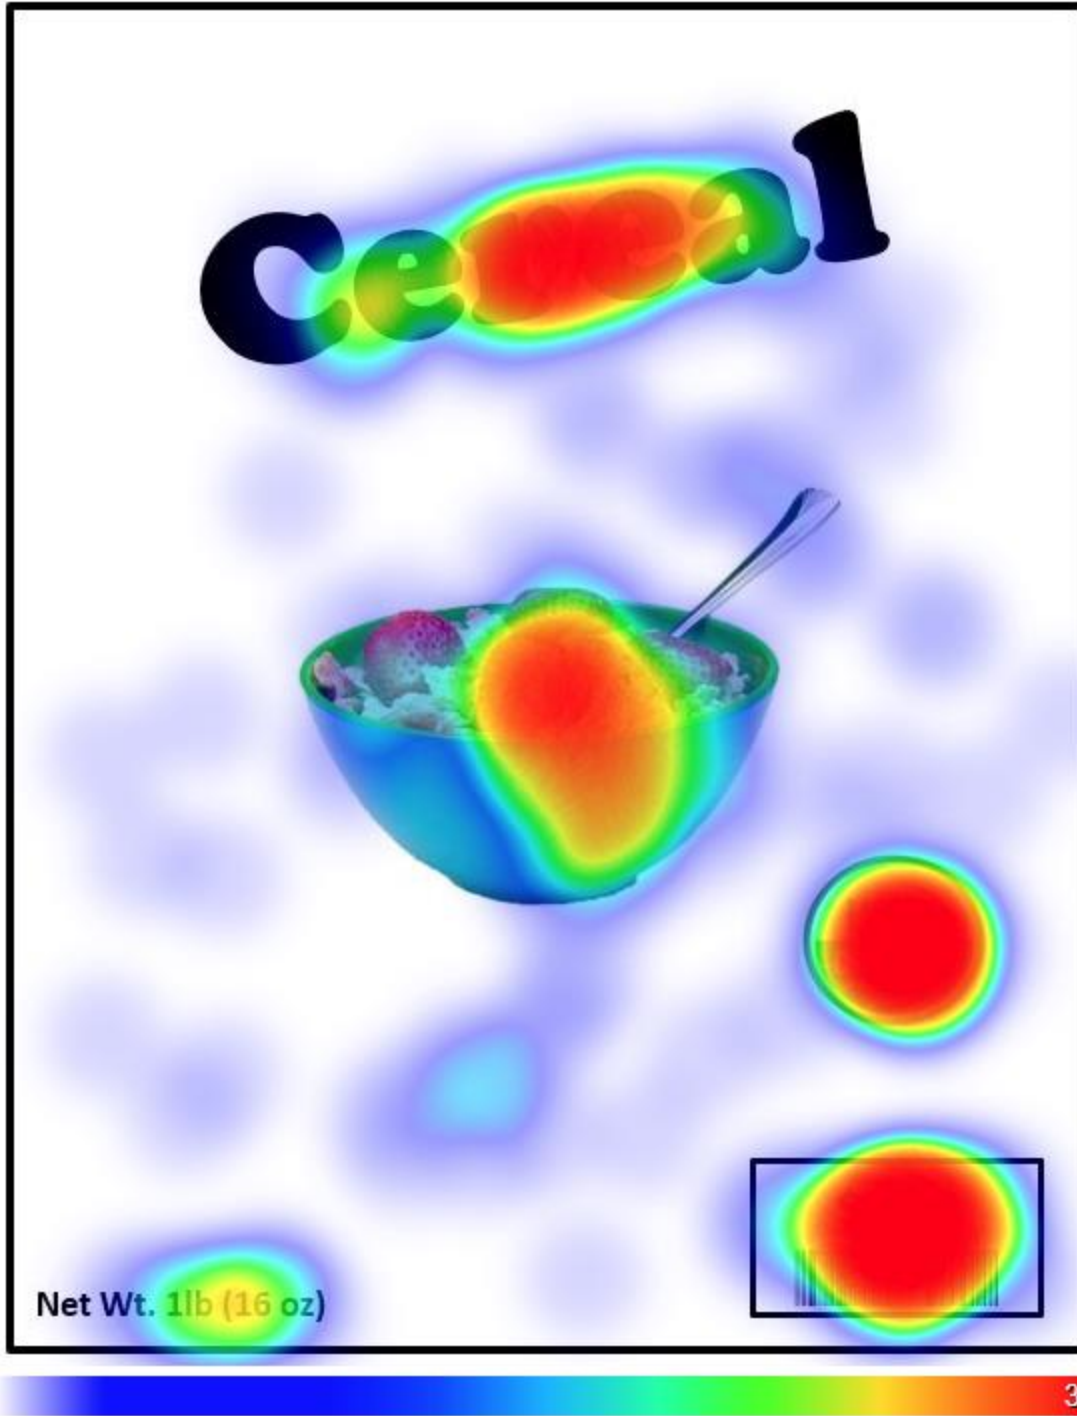

Q54 If you encountered this box of cereal in the grocery store, how likely would you be to purchase it? (0 = no chance of buying; 100 = 100% chance of buying)

End of Block: cereal7\_organic\_low

Start of Block: cereal8\_organic\_hi

Q55 Which part of the cereal box below is most attractive to you? (please click or touch the image in the most attractive location)

# Cereal

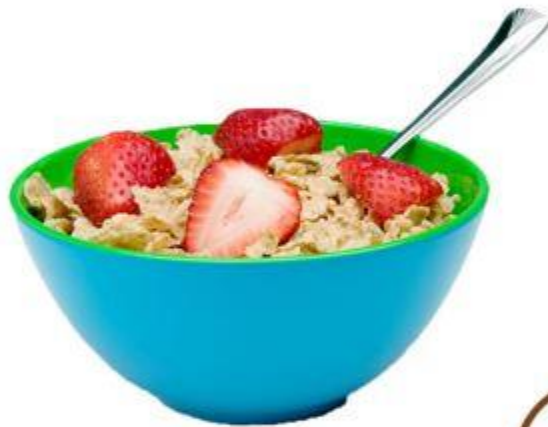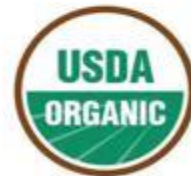

**\$4.98**

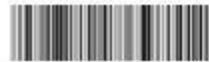

Net Wt. 1lb (16 oz)

# Cereal

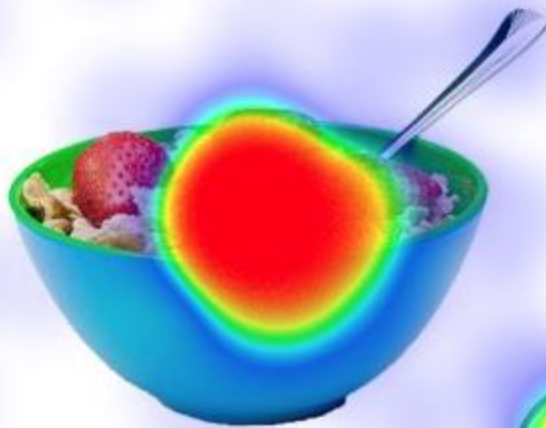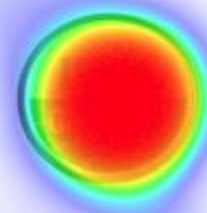

\$4.98

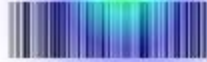

Net Wt. 1lb (16 oz)



Q56 Which part of the cereal box below is least attractive to you? (please click or touch the image in the most attractive location)

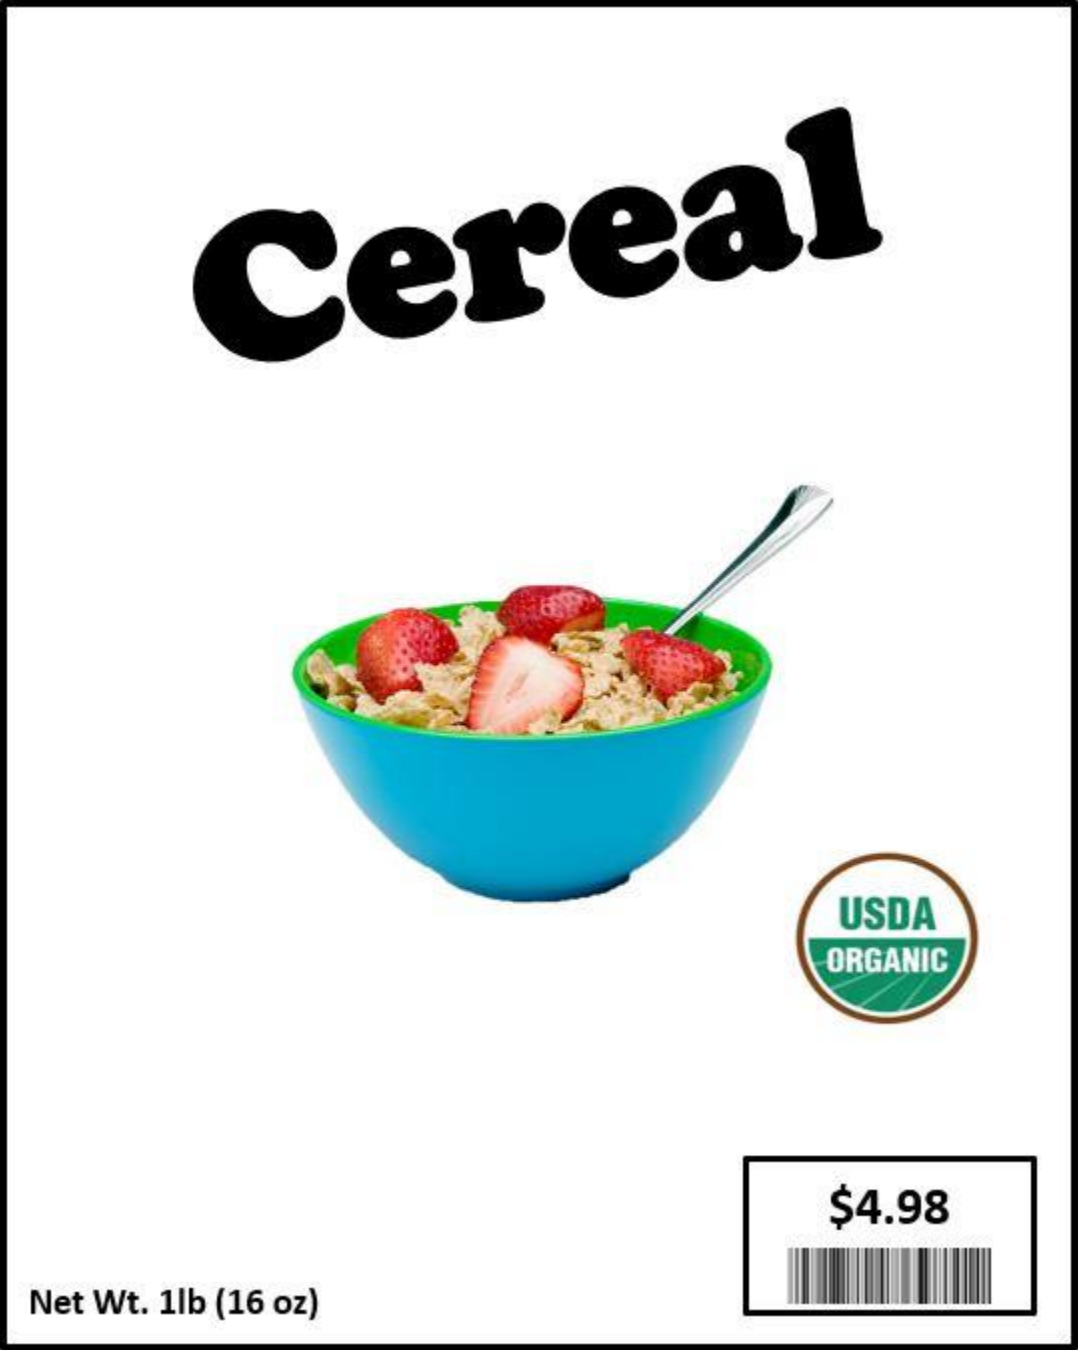

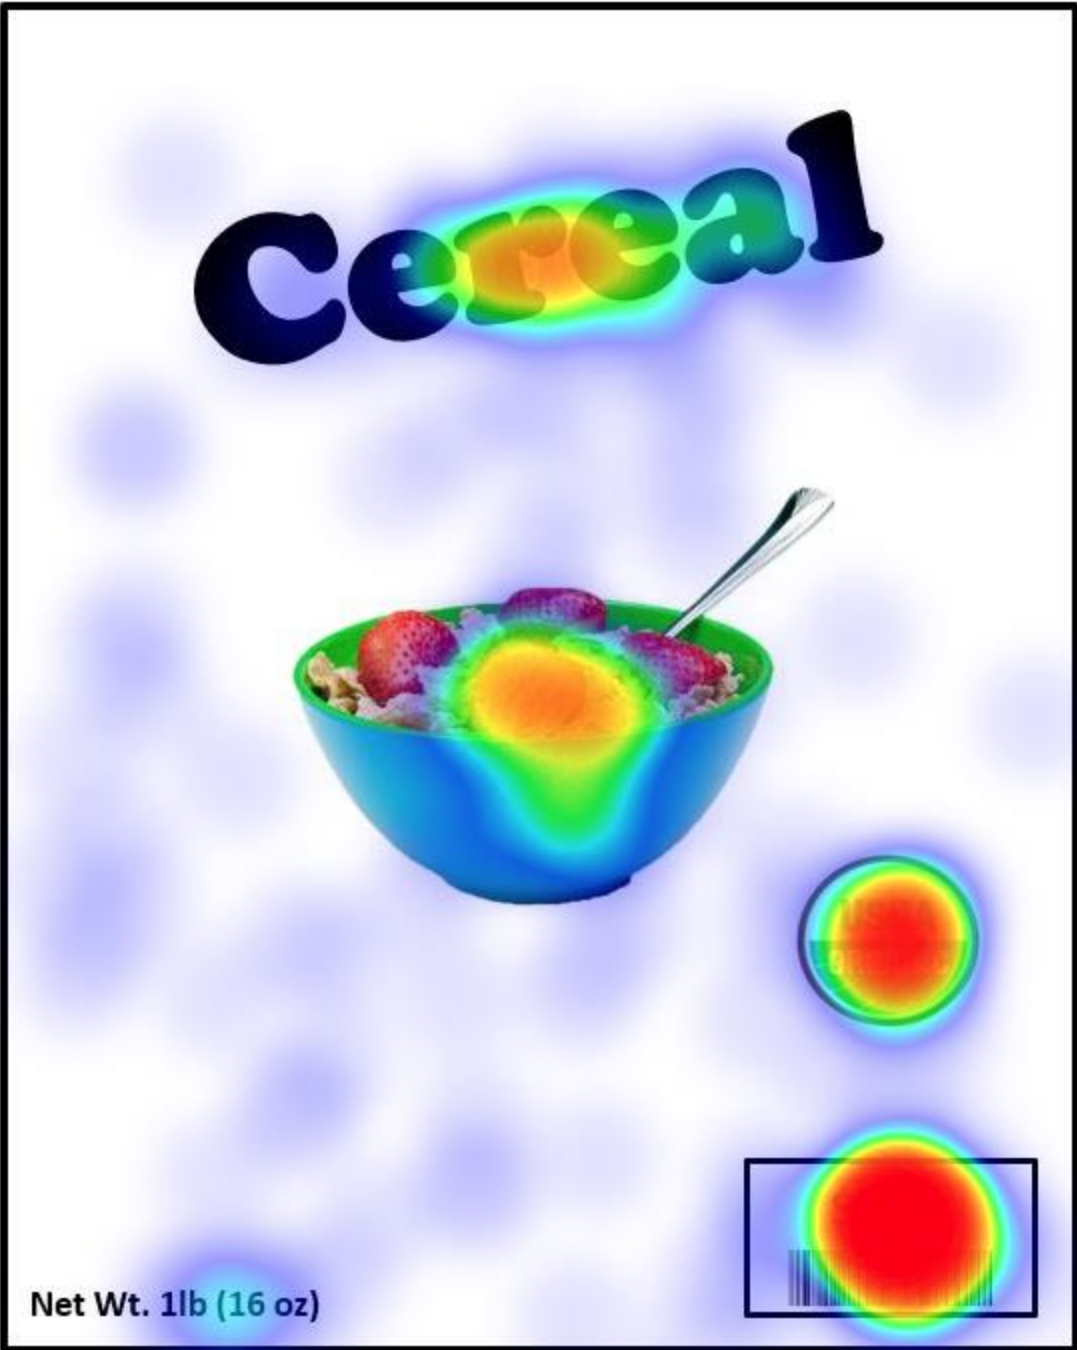

Net Wt. 1lb (16 oz)

65

Q57 If you encountered this box of cereal in the grocery store, how likely would you be to purchase it? (0 = no chance of buying; 100 = 100% chance of buying)

End of Block: cereal8\_organic\_hi

Start of Block: cereal9\_combo\_low

Q58 Which part of the cereal box below is most attractive to you? (please click or touch the image in the most attractive location)

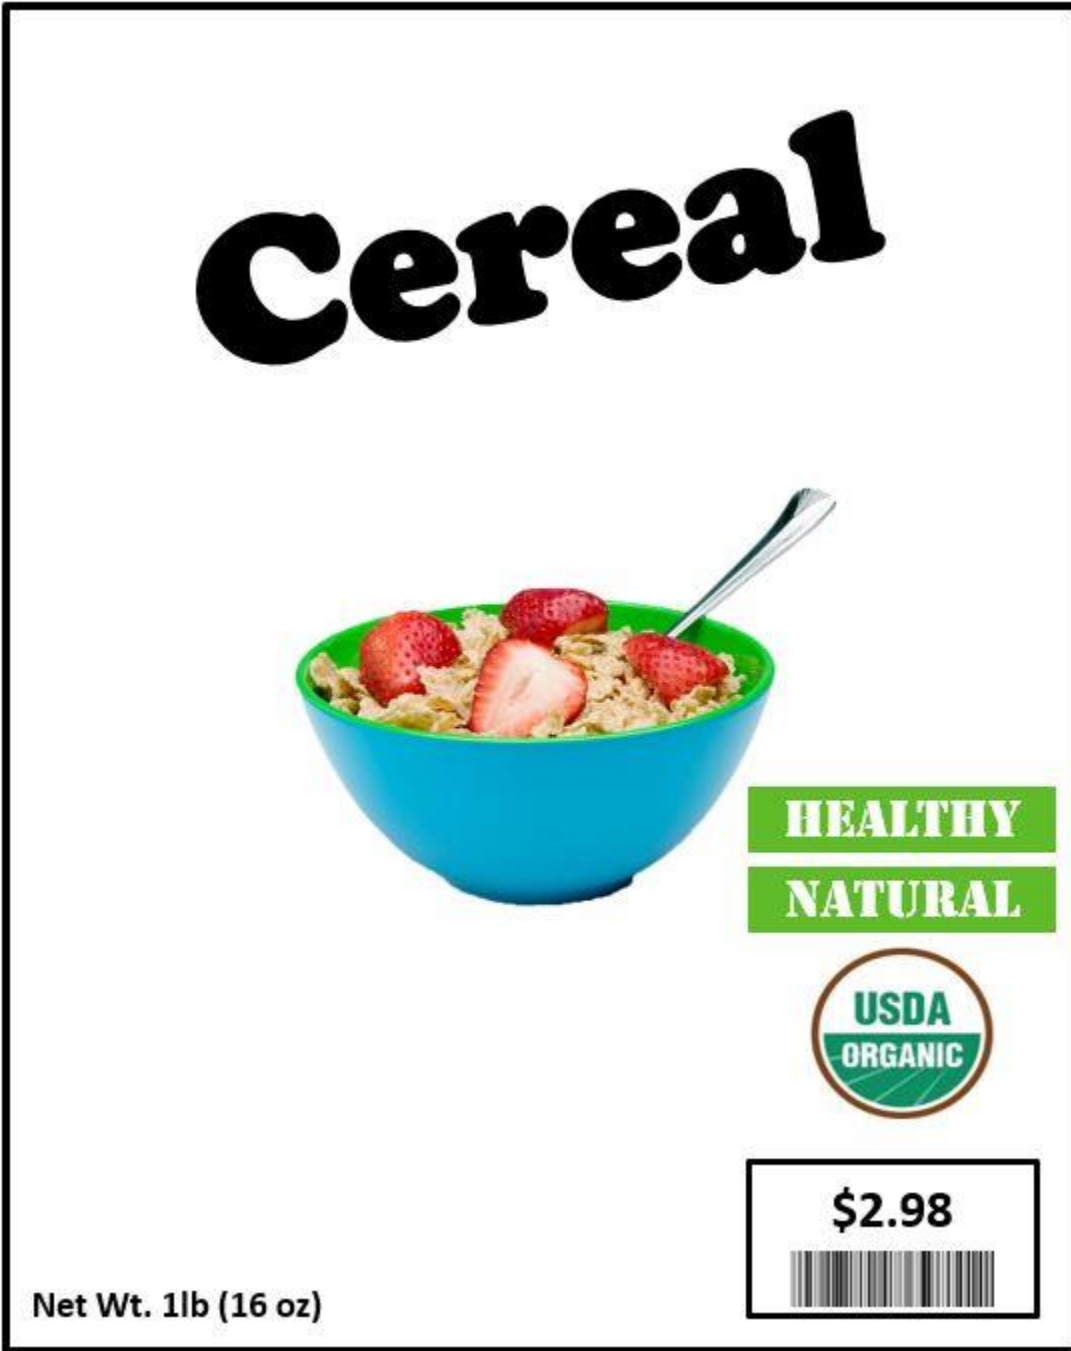

# Cereal

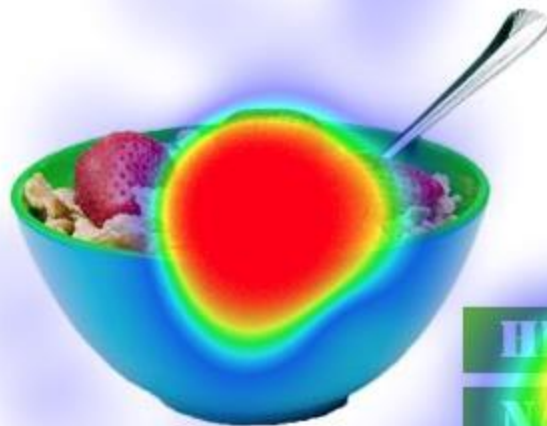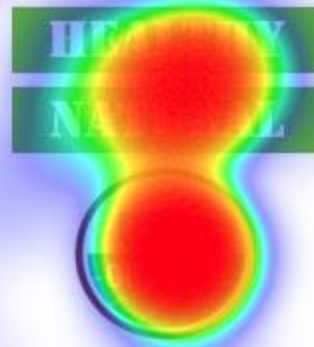

\$2.98

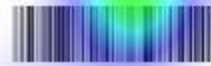

Net Wt. 1lb (16 oz)

61

Q59 Which part of the cereal box below is least attractive to you? (please click or touch the image in the most attractive location)

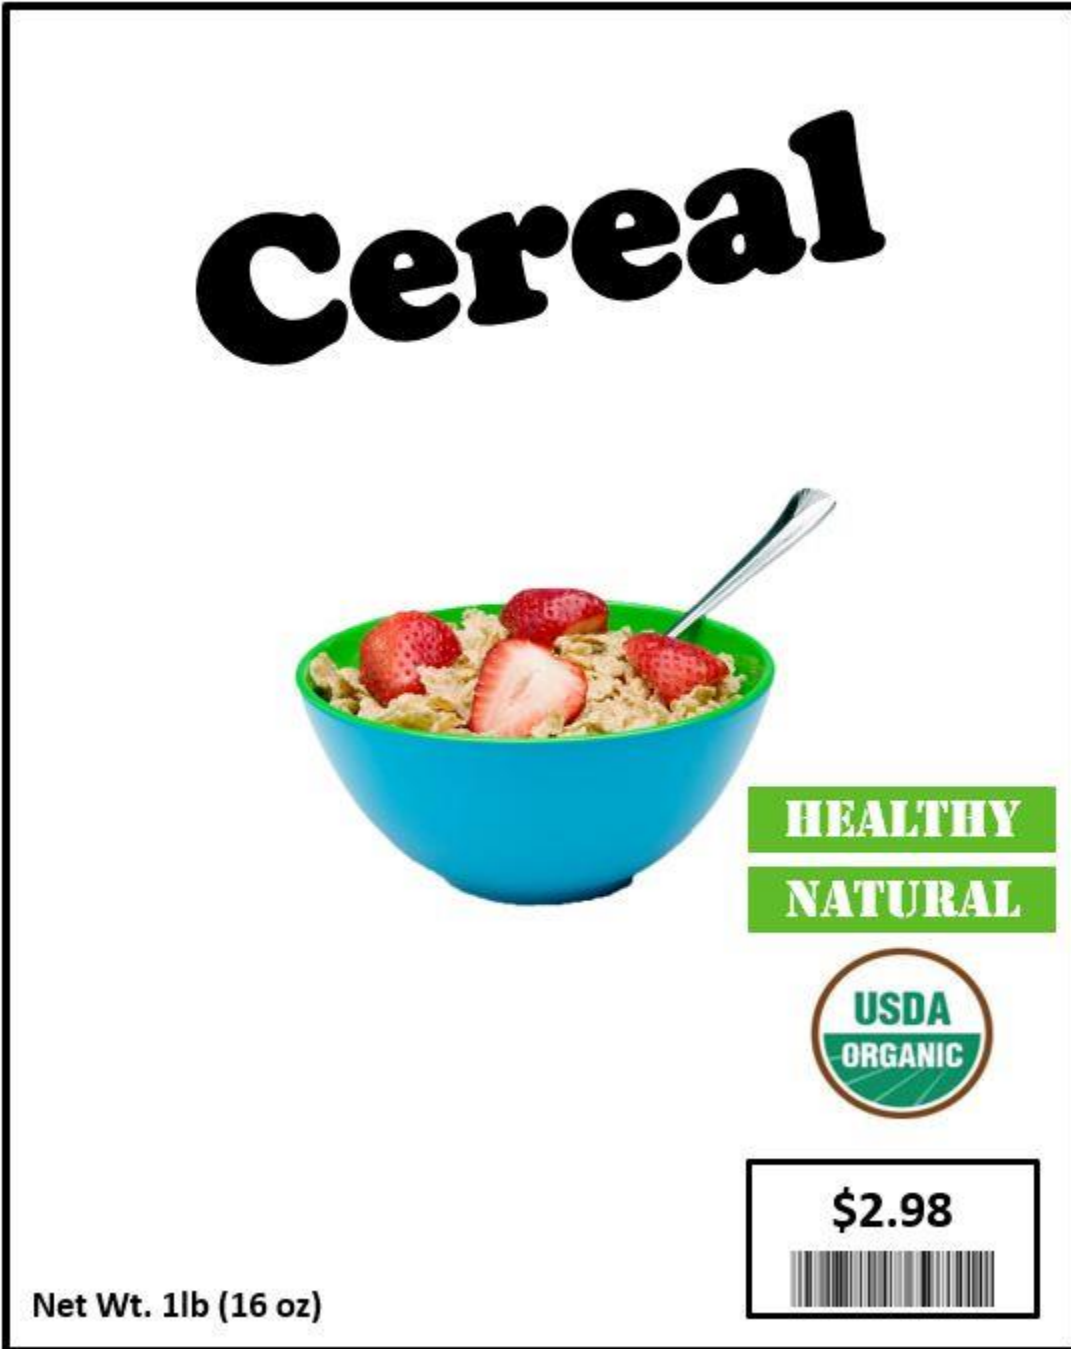

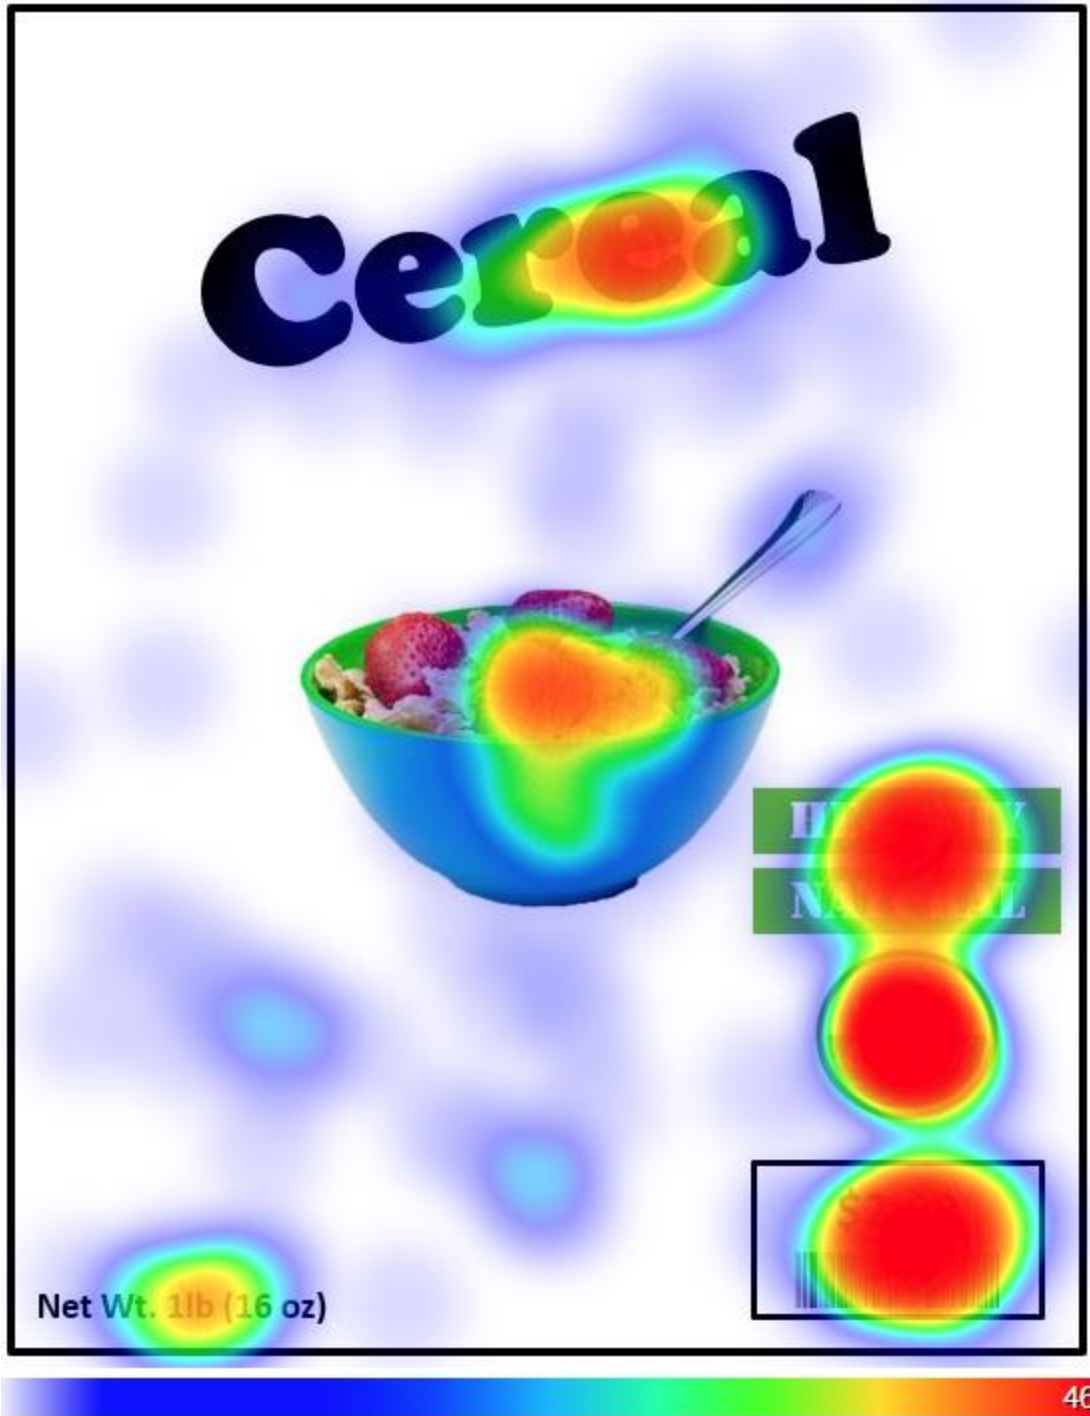

Q60 If you encountered this box of cereal in the grocery store, how likely would you be to purchase it? (0 = no chance of buying; 100 = 100% chance of buying)

End of Block: cereal9\_combo\_low

Start of Block: cereal10\_combo\_hi

Q61 Which part of the cereal box below is most attractive to you? (please click or touch the image in the most attractive location)

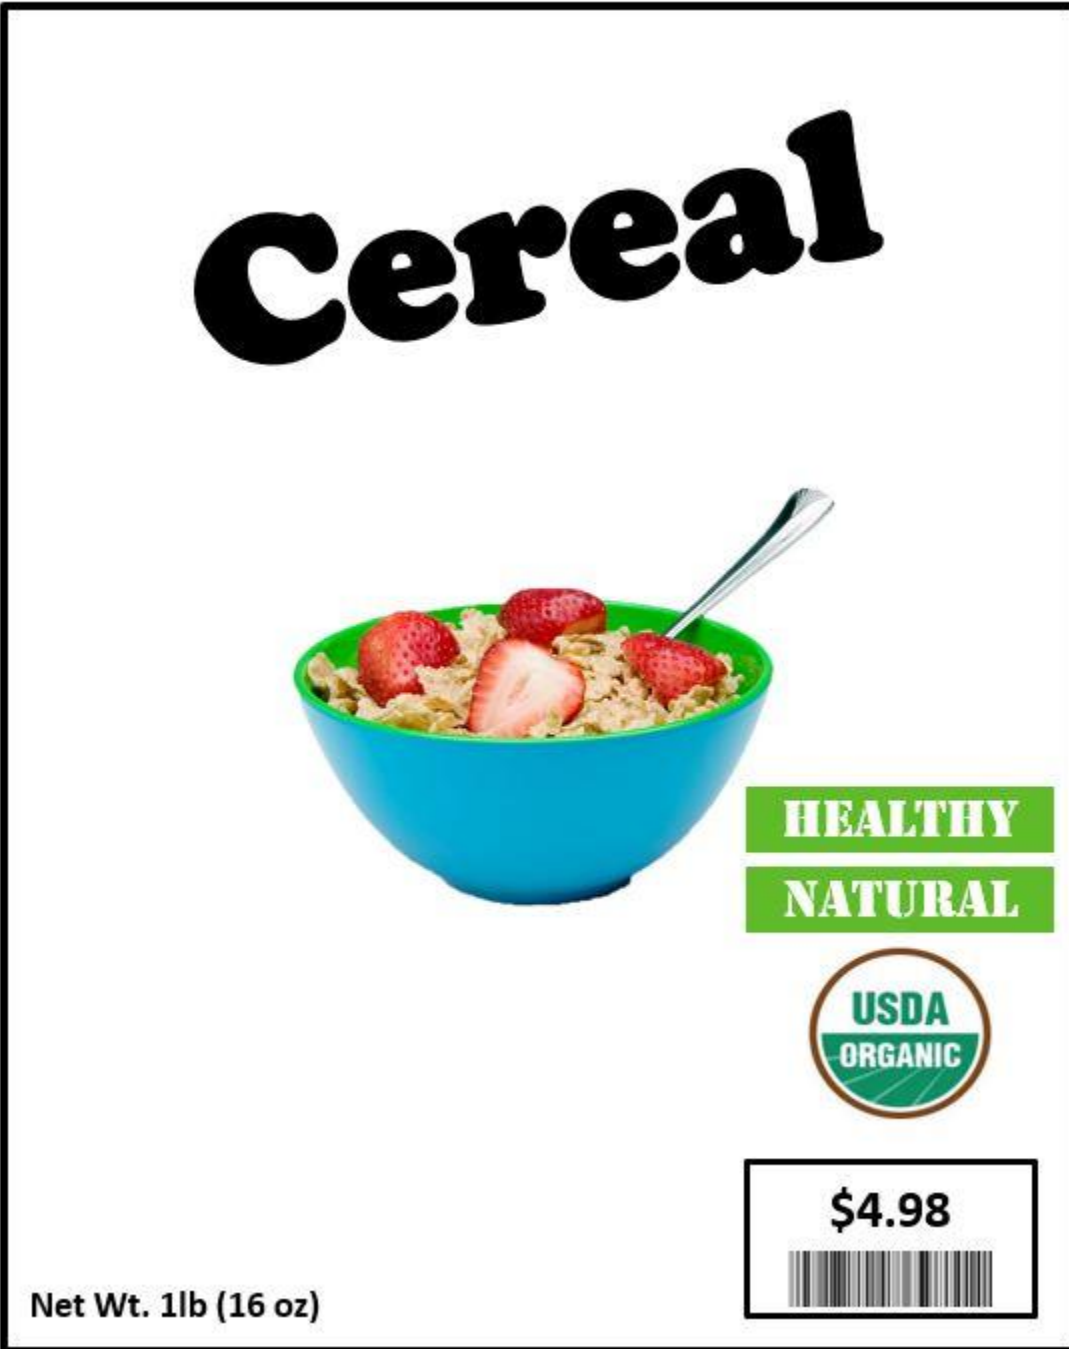

# Cereal

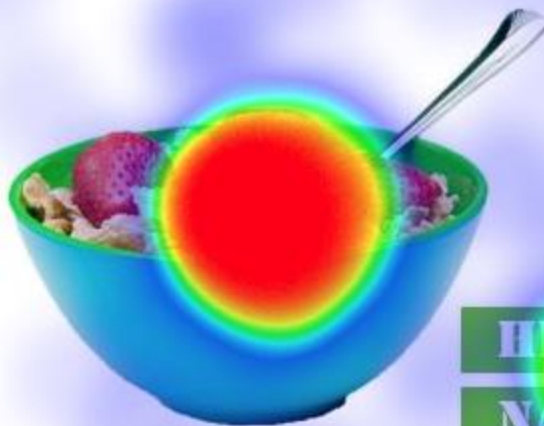

HEAT  
MAP

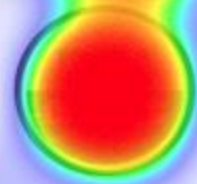

\$4.98

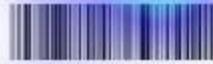

Net Wt. 1lb (16 oz)



Q62 Which part of the cereal box below is least attractive to you? (please click or touch the image in the most attractive location)



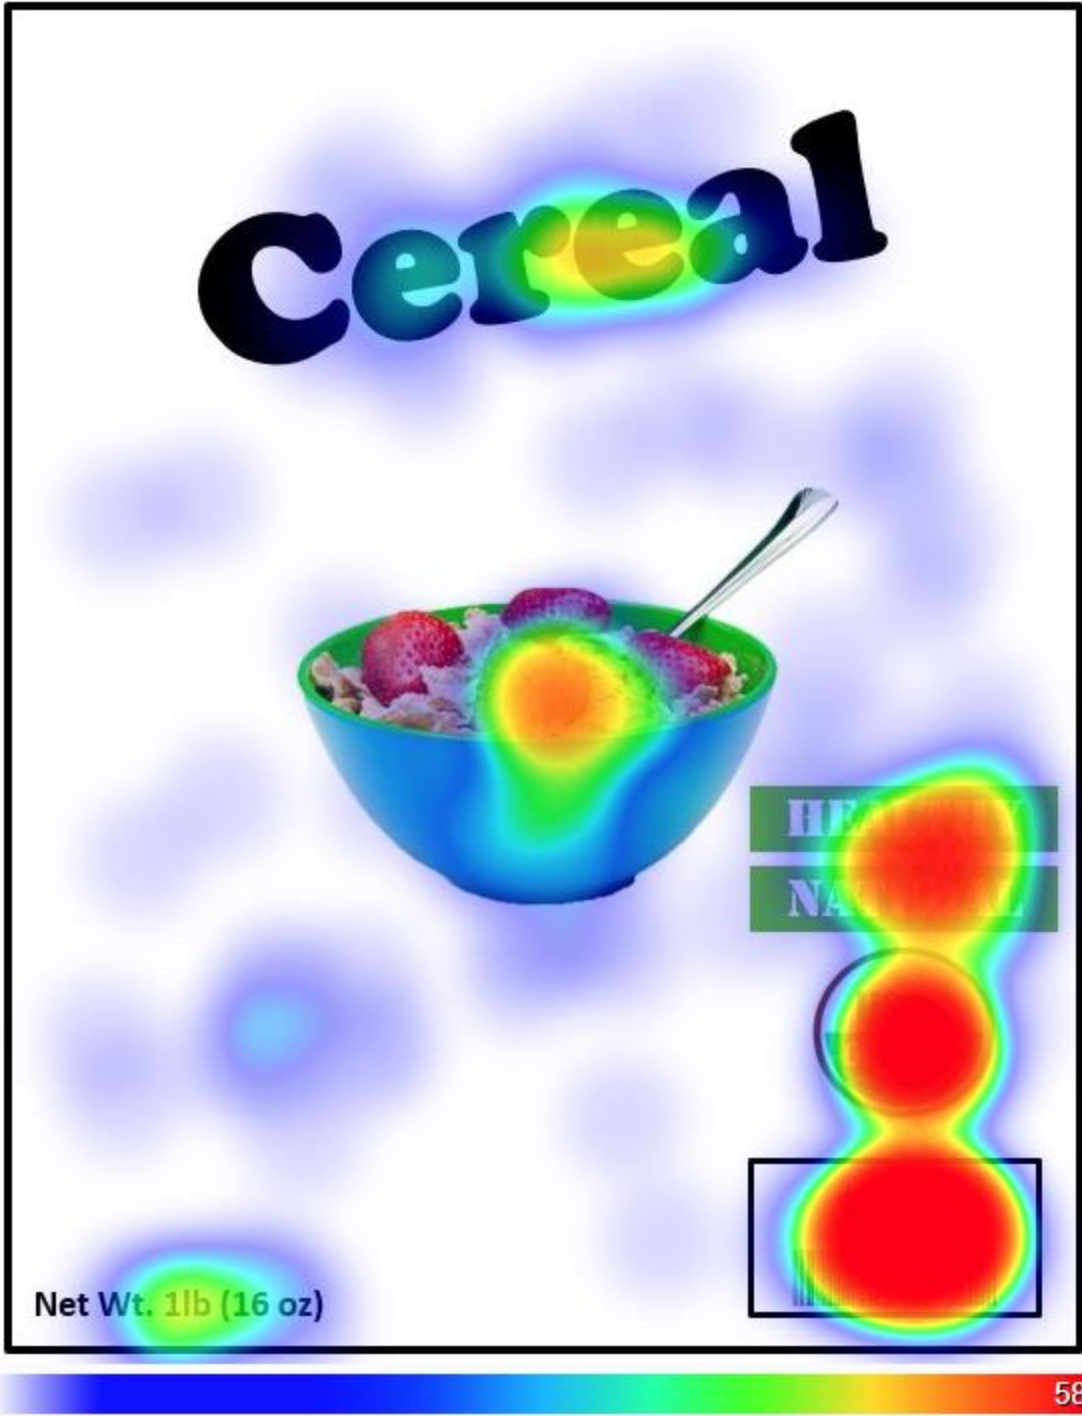

Q63 If you encountered this box of cereal in the grocery store, how likely would you be to purchase it? (0 = no chance of buying; 100 = 100% chance of buying)

End of Block: cereal10\_combo\_hi
